**Screening for Poverty And Related Social determinants to improve Knowledge of and links to resources (SPARK): development and cognitive testing of a tool for primary care**

Itunuoluwa Adekoya, MSc<sup>1</sup>, Alannah Delahunty-Pike, MSc<sup>2</sup>, Dana Howse PhD<sup>3</sup>, Leanne Kosowan MSc<sup>4</sup>, Zita Seshie PhD<sup>5</sup>, Eunice Abaga<sup>1</sup>, Jane Cooney<sup>1</sup>, Marjeiry Robinson<sup>1</sup>, Dorothy Senior<sup>1</sup>, Lynn Thompson<sup>1</sup>, Alexander Zsager<sup>1</sup>, Kris Aubrey-Bassler MD CCFP MSc<sup>3,6</sup>, Frederick Burge MSc MD<sup>2</sup>, Mandi Irwin MD<sup>2</sup>, Lois Jackson PhD<sup>7</sup>, Alan Katz MBChB, MSc CCFP<sup>4,8</sup>, Emily Marshall PhD<sup>2</sup>, Nazeem Muhajarine AB MSc PhD<sup>9,10</sup>, Cory Neudorf MD FRCPC MHSc<sup>9,10</sup>, Andrew D. Pinto MD CCFP FRCPC MSc<sup>1,11,12,13\*</sup>

***Affiliations***

1. Upstream Lab, MAP Centre for Urban Health Solutions, Li Ka Shing Knowledge Institute, Unity Health Toronto
2. Department of Family Medicine, Dalhousie University
3. Primary Healthcare Research Unit, Memorial University of Newfoundland and Labrador
4. Department of Family Medicine, Rady Faculty of Health Sciences, University of Manitoba
5. Department of Community Health & Epidemiology, University of Saskatchewan
6. Faculty of Medicine, Memorial University
7. School of Health and Human Performance, Dalhousie University
8. Manitoba Centre for Health Policy, University of Manitoba
9. Saskatchewan Population Health and Evaluation Research Unit
10. College of Medicine, University of Saskatchewan
11. Department of Family and Community Medicine, St. Michael's Hospital
12. Department of Family and Community Medicine, Faculty of Medicine, University of Toronto
13. Dalla Lana School of Public Health, University of Toronto

***\*Address correspondence to:***

Andrew D. Pinto

Upstream Lab, MAP Centre for Urban Health Solutions, Li Ka Shing Knowledge Institute, Unity Health Toronto

30 Bond Street, Toronto, ON, M5B 1W8

416-864-6060 x76148

[andrew.pinto@utoronto.ca](mailto:andrew.pinto@utoronto.ca)

## **Abstract**

### ***Background***

Healthcare organizations are increasingly exploring ways to address the social determinants of health. Accurate data on social determinants is essential to identify opportunities for action to improve health outcomes, to identify patterns of inequity, and to help evaluate the impact of interventions. The objective of this study was to refine a standardized tool for the collection of social determinants data through cognitive testing.

### ***Methods***

An initial set of questions on social determinants for use in healthcare settings was developed by a collaboration of hospitals and a local public health organization in Toronto, Canada during 2011-2012. Subsequent research on how patients interpreted the questions, and how they performed in primary care and other settings led to revisions. We administered these questions and conducted in-depth interviews with participants from Saskatchewan, Manitoba, Ontario, and Newfoundland and Labrador. Cognitive interviewing was used, with participants invited to verbalize thoughts and feelings as they read the questions.

### ***Results***

Three hundred and seventy-five individuals responded to the study advertisements and 195 ultimately participated in the study. Although all interviews were conducted in English, participants were diverse. For many, the value of this information being collected in typical healthcare settings was unclear, and hence, we included descriptors for each question. In general, the questions were understood, but participants highlighted a number of ways the questions could be changed to be even clearer and more inclusive.

### ***Conclusion***

In this work we have refined an initial set of 16 sociodemographic and social needs questions into a simple yet comprehensive 18-question tool. The changes were largely relating to wording, rather than content. These questions require validation against accepted, standardized tools. Further work is required to enable community data governance, and to ensure implementation of the tool and well as use of its data is successful in a range of organizations.

## **Background**

The social determinants of health are the conditions in which we live, work and play that impact individual and population health.<sup>1</sup> Our income, social status, education, as well as our physical environment are key social determinants of health.<sup>2</sup> While the relationship between social factors and health has been known for millenia<sup>3</sup>, healthcare services have typically focused on biomedical solutions. Substantial evidence that improved access during the 20<sup>th</sup> century to healthcare services did not result in reduced health inequities<sup>4,5</sup> led to research on root causes. This culminated in the World Health Organization Commission on the Social Determinants of Health.<sup>1,6,7</sup> In the Commission's 2008 Final Report, governments were urged to explore how healthcare systems can consider and address social determinants.<sup>8-10</sup> Subsequently, the British Medical Association<sup>9</sup>, the Canadian Medical Association<sup>8</sup>, the College of Family Physicians of Canada<sup>11</sup>, the American College of Physicians<sup>10</sup> and other bodies have developed guidelines to support health providers and health organizations to take action on social determinants of health.

Accurate data on social determinants that is linked to or part of an individual's health records is essential to identify opportunities for action to improve health outcomes, to identify patterns of inequity at an organization or community level, and to help evaluate the impact of interventions to reduce inequities.<sup>12</sup> While social data is often elicited during clinical visits, this information varies between providers and is scattered in different parts of the health record. In most countries, few health providers or organizations routinely collect data in an organized way on the social determinants of health, beyond sex and age.<sup>12,13</sup>

The objective of this study was to refine a standardized tool for the collection of robust social determinants data, building on previous work, and to conduct cognitive testing with a large group of diverse individuals through in-depth interviews.

## **Materials and methods**

Research ethics approval was obtained from Unity Health Toronto (#20-241), the University of Manitoba Health Research Ethics Board (#HS24204), the Newfoundland and Labrador Health Research Ethics Board (# 2020.259) and the Saskatchewan Behavioural Research Ethics Board (#2373).

### ***Background to the SPARK Tool***

An initial set of questions on social determinants for use in healthcare settings was developed by a collaboration of hospitals and a local public health organization in Toronto, Canada during 2011-2012.<sup>1</sup> Questions on language, immigration, race, ethnicity, religion, disability, gender identity, sexual orientation, income, and housing were constructed based on a review of the literature, meetings and consultations. These questions were pilot tested with approximately 1600 individuals across four organizations.<sup>12,13</sup> Subsequent research on how patients interpreted the questions, and how they performed in primary care<sup>14-17</sup> and other settings<sup>18</sup>, led to revisions and the inclusion of additional domains including employment, medication access and social isolation. Following pilot testing of these revised questions in five primary care clinics in Ontario, the questions were further refined, resulting in the Screening for Poverty And Related determinants to improve Knowledge of and links to local resources (SPARK) Tool. The SPARK

## *SPARK Tool: Development and cognitive testing*

Tool includes 16 questions that cover demographics (language, immigration status, Indigenous identity, race, disability status, sex at birth and gender identity, sexual orientation) and social needs (education, income, medication access, housing status, social isolation, transportation, cost of utilities, and precarious employment) [[Appendix 1](#)].

### ***Data collection***

To further refine the questions and complete cognitive testing, we administered the SPARK Tool and conducted in-depth interviews with a diverse set of individuals. Participants were recruited from four provinces in Canada: Saskatchewan, Manitoba, Ontario, and Newfoundland and Labrador. Study advertisements were circulated using social media, through classified advertising websites, using collaborator distribution lists, and with posters placed in waiting rooms in health centers and community spaces. Study advertisements were in English, French and the top three non-Indigenous languages spoken in participating provinces according to the latest national census<sup>19</sup>: Arabic, Farsi, Punjabi, simplified Chinese, and Tagalog. All interviews were conducted virtually and consent was obtained from participants once they had read and understood the detailed information sheet provided. Interviews were multi-part (completing the SPARK Tool using a think aloud process, additional comparator questions, and open-ended questions), and lasted approximately 1.5 hours. Data on Indigenous identity and race were not collected in Manitoba, based on feedback from the local research ethics board on the potential negative impact on relationships with Indigenous communities. In this paper, we report on the results of cognitive testing.

Cognitive interviews were conducted by five members of the study team (ADP, DH, IA, LK, ZS) and two research assistants, who all identified as female. All interviewers had moderate to extensive experience with conducting qualitative interviews but most were new to cognitive interviewing. Cognitive interviewing is a technique used to gain insight into learners' perceptions in which individuals are invited to verbalize thoughts and feelings as they examine information.<sup>20</sup> In this study, surveys were self-administered in the presence of the interviewer. Participants were asked to read the survey question and options provided aloud and *think aloud*, by sharing their immediate thoughts on each question. Participants then selected their answer choice. Minimal unscripted concurrent probing was done by interviewers, except to prompt participants to continue to think aloud throughout the survey. Interviewers recorded the thoughts of participants for each question. Interviewers were trained to look out for: issues related to question wording, issues related to unclear question objective, questions with redundancy or repetitiveness, issues of burden or length of the survey, and questions that lacked options participants frequently want to select.<sup>21</sup>

### ***Data analysis***

The analysis was conducted by the five members of the study team who had conducted the interviews. Informal analysis of the cognitive interviews was conducted as described by Willis.<sup>21</sup> Using the interview notes, we thematically grouped unique topics or concerns that emerged for each question and assessed the frequency of each theme. Results were summarized by each question in a table with columns describing the topic or concern, and the frequency of each theme. Study team members reviewed the themes question-by-question and updated the SPARK Tool to address high frequency topics or concerns. This was done in a series of meetings where study team members discussed each question, including all topics or concerns, as well as

potential solutions suggested by the participants to determine how to improve the SPARK Tool. Decisions made for each question were recorded. Topics or concerns were addressed by either modifying question wording, adding, editing or removing answer options, or replacing the question. Once a first draft was created, the Tool was presented to the larger study team, comprised of researchers and patient partners, to provide feedback on the changes. The Tool was also presented to an advisory committee that included subject matter experts on sociodemographic data. Feedback was received from other subject matter experts that were not part of the study team or advisory committee through emails and brief one-on-one meetings. Once all the feedback was incorporated, the SPARK Tool was finalized (Table 2).

## **Results**

Three hundred and seventy-five individuals responded to the study advertisements and 195 ultimately participated in the study: 125 (64.1%) from Ontario, 25 (12.8%) from Saskatchewan, 24 (12.3%) from Manitoba, and 21 (10.8%) from Newfoundland and Labrador. All interviews were conducted in English. Participants were diverse: 148 (76%) identified as non-white, 71 (36%) indicated not being born in Canada, and 38 (19.5%) noted they had difficulty making ends meet at the end of the month (Table 1). In the following, we discuss the topics that emerged from the cognitive interviews and decisions made to improve the SPARK Tool.

### ***General perspectives on the SPARK Tool***

Throughout the SPARK Tool, many participants indicated they were unclear why some questions were asked in the context of receiving healthcare. Based on this feedback, we added descriptions to each question, to explain the purpose of the question and its potential use in care at an individual and organisational level. Many participants also indicated being unfamiliar with terms used, and descriptions also provide definitions.

For many questions about social needs, participants expressed confusion concerning the timeframe for and frequency of the social need they were being asked to indicate. For example, with the question, “*Do you have difficulty making ends meet at the end of the month?*”, participants indicated they could make ends meet some months (frequency) or could regularly make ends meet a year ago but not currently (timeframe). To address this feedback, we updated the questions to include a specific timeframe (e.g. ‘in the past 12 months’) and, in some cases, updated answer options to include frequency (e.g., ‘always’ or ‘sometimes’).

For questions that had ‘not applicable’ as an option, many participants were confused about the difference between ‘no’ and ‘not applicable’. Therefore, we qualified the ‘not applicable’ option with a short phrase. For example, for the question about paying one’s rent or mortgage on time, we replaced ‘not applicable’ with ‘not applicable, I do not have to pay rent or mortgage’.

For certain questions, such as those concerning whether the participant was born in Canada, sex at birth, gender identity, and sexual orientation, several participants noted they may be unwelcome or uncomfortable to complete. To address this concern, the research team included a ‘prefer not to answer’ option to all the questions in the final survey.

### ***Additional and optional questions***

Based on feedback from study participants, research staff, patient partners, advisory committee members, and other subject matter experts, additional domains were added to the questions on social needs, including questions on food security, and phone and internet access. Ethnicity and religion were added as optional questions. These optional questions should be used at the discretion of healthcare leaders if feel that they are necessary for use at their respective healthcare organizations.

### **Perspectives on the separate SPARK Tool questions**

A side by side comparison of the SPARK Tool used in this study and the updated and finalized version of the SPARK Tool is shown in Appendix 2.

### ***Language preference for healthcare and need for translation***

The wording of the question concerning language needs, “*If it could be arranged, would translation into another language be helpful at your next appointment?*”, was unclear for only seven (3.6%) participants. Five (2.6%) participants were unsure if the question was referring to a healthcare appointment or any appointments. To clarify, we added ‘healthcare’ to the updated question. In addition, to reduce data entry error, we added a list of optional drop-down answer choices for language preferred. The options are based on the top 20 languages and top five Indigenous languages spoken most often at home in Canada based on the 2016 Statistics Canada Census data.<sup>19</sup>

### ***Born in Canada***

Among 71 (36%) participants that were not born in Canada, three participants could not recall what year they arrived to Canada. Given that this question is aimed at determining newcomer status, we revised the answer options to include ‘less than 5 years’, ‘5 to 9 years’ and ‘10 years or more’ instead of an open-text field. This reduces data entry error and addresses recall issues. It also fits with Statistics Canada’s definition of a recent immigrant or newcomer, which refers to a person who obtained a landed immigrant or permanent resident status up to five years prior to a given census year.<sup>22</sup> A limitation of this question is that it does not account for people who arrived more than once in Canada. Three (1.5%) participants expressed confusion, indicating that they moved to Canada more than once.

### ***Indigenous identity***

In this paper, we have not reported cognitive interview results from study participants on this question as we believe that the reporting of these results should be governed and led by Indigenous communities. We have included in the descriptor that this data must be collected with engagement with local First Nations, Métis, and Inuit governance bodies in accordance with the First Nations OCAP, Métis OCAS, and Inuit Qaujimajatuqangit data governance and sovereignty principles.<sup>23–26</sup>

### ***Race***

The race question includes a preamble intended to explain why race is being asked about at a healthcare appointment. Twelve (6.1%) participants indicated that the preamble was too

## *SPARK Tool: Development and cognitive testing*

technical or overwhelming or requested simpler language. Eight (4.1%) participants noted that ‘not based in science’ is technically incorrect or unnecessary (e.g., sociology is considered a science, skin color differences are studied in certain scientific disciplines i.e., melanin), and some noted that ‘not based in biology’ is a more appropriate phrase. In addition to suggested edits to the preamble, eighteen (9.2%) participants requested examples of countries or regions for each race category in the answer options, which we have now included. Fifteen participants wanted the ‘White’ and ‘Black’ option to be separated into different “types” of White or Black people. For example, participants suggested splitting the ‘Black’ option into African, Afro-Caribbean, African American etc. However, based on the definition of race and ethnicity, which we describe in the newly added descriptors, “types” of white or black people would correspond with ethnicity. The revised SPARK Tool provides an optional ethnicity question to address this topic. Eight (4.1%) participants indicated preference for an ethnicity question instead of a race question. While the participant feedback on this question was valuable and informed the creation of and changes to other questions, we did not edit this question in light of the cognitive interview. Rather, in keeping with national standards, we opted to align our final question including the preamble and answer options, with the standards for collecting race-based data released by the Canadian Institute for Health Information (CIHI) in March 2022.<sup>27</sup>

### ***Disability status***

For 38 (19.5%) participants, the disability question, “*In general, do you experience any of the following due to a physical, mental, or emotional condition?*”, and its answer options were seen as too broad and subject to interpretation. For example, ‘difficulty communicating’ may refer to a speech impairment or language barriers. Some participants (34, 17.4%) were unsure if a difficulty they experienced should be included. More specifically, there were 12 participants (6.1%) who were unsure if they should say they have a difficulty if it could be corrected with assistance (e.g., glasses for ‘difficulty seeing’). Based on the feedback we received, the study team revised the question to include ‘due to a severe and persistent physical, mental or emotional condition’. Additionally, the study team revised the answer options based on participant feedback. For example, it was unclear what ‘self-care’ meant to 19 (9.7%) participants, so we changed that option to ‘personal hygiene’. Including examples in the answer options and adding a descriptor helped to clarify that this question is intended to identify conditions that are severe and disabling. Eleven (5.6%) participants felt the options provided were limited and did not account for difficulties associated with having a mental health condition. The addition of answer options to include ‘difficulty with activities for daily living’ captures difficulties mentioned in the cognitive interviews that were not present in the original answer option.

### ***Sex at birth***

For the question, “*What was your sex assigned at birth?*”, six (3.1%) participants noted that ‘intersex’ status is not necessarily always ‘assigned’ at birth, therefore ‘assigned’ was removed from the question.

### ***Gender identity***

For the question, “*What is your current gender identity?*”, based on feedback from subject matter experts, the term ‘current’ was removed from the question as it was deemed redundant or unnecessary for answering the question. Nine (4.6%) participants felt the options provided for gender identity were limited. Based on feedback from the participants as well as from subject

matter experts, additional options, including ‘transgender woman’ and ‘transgender man’ were included in the question. For five (2.6%) participants, the difference between ‘sex at birth’ and ‘gender identity’ was unclear, and hence, the descriptor includes an explanation.

### ***Sexual orientation***

Two additional options, ‘demisexual’ and ‘asexual’, were added to the sexual orientation question (‘which best describes your sexual orientation?’) as 17 (8.7%) participants felt that the original options were too limited, and a few participants specifically mentioned those options should be included. This change was supported by the study team’s review of the literature and consultations with subject matter experts. We removed the definition in the ‘heterosexual’ option (‘male/female relationships or two different binary genders’) based on feedback from 16 (8.2%) participants who felt it was unnecessary, some of whom found it offensive. ‘Queer’ and ‘pansexual’ were separated into two different options as 9 (4.6%) participants highlighted that these terms are not synonymous. Some participants (2, 1.0%) indicated that they felt that gender could be represented by more than one answer option (e.g., queer and bisexual), therefore individuals can now select multiple options.

### ***Education***

For the education question, “*What is the highest level of education you have completed?*”, three (1.5%) participants and a patient partner on our study team felt that the phrase ‘highest level of education’ in the question was un-inclusive, hierarchical, elitist, or offensive, so the term ‘highest’ has been removed. Twenty-one (10.8%) participants mentioned that the education answer options were too limited and, in some cases, confusing. Therefore, several options were added or revised including replacing ‘trades certificate/diploma’ and ‘college/university degree’ with ‘college, CEGEP or other non-university certificate or diploma’, ‘completed registered apprenticeship or other trades certificate or diploma’ and ‘undergraduate degree’. Examples were added to clarify the term ‘postgraduate’ as 14 (7.2%) participants, many of which spoke English as a Second Language (ESL) or completed their education outside of Canada, were unfamiliar with the term. We clarified or removed the word ‘some’ in the options and replaced with ‘ongoing’ in most cases. One limitation to the updated question is that participants are not able to select more than one option for their level of education as requested by 9 (4.6%) participants. For example, in instances where a participant has attended both college and university and considers both education levels to be equivalent, they are forced to pick just one. Multiple choice selection was not added to this question as its purpose is to ascertain literacy level indicated by education level.

### ***Finances***

We changed the question from “*Do you have difficulty making ends meet at the end of the month?*” to “*Do you currently have difficulty paying for basic needs?*” as 26 (13.3%) participants, many of whom were ESL speakers, found the term ‘making ends meet’ difficult to understand. For 7 (3.6%) participants, it was unclear how to define a basic or essential need, so we included clarification in the descriptor. One limitation to the updated question is that it does not capture people who are able to pay for basic needs like food, shelter, clothing, but still have serious financial difficulties. This concern was identified by 7 (3.6%) participants. This brief question may not accurately capture every aspect of a person's financial situation. However, it



has been validated as a good predictor of poverty and identifying individuals living below the “poverty line” or low-income cut-off (LICO).<sup>28</sup>

### ***Access to prescription medication insurance***

Three (1.5%) participants felt that the question about medication access (‘in the last 12 months, did you avoid filling a prescription or do anything to make a prescription last longer because of the cost?’) did not consider medical devices or supplies (e.g., for diabetes management), as well as over-the-counter (OTC) medications, which may not be prescribed. To account for patients’ diverse medical needs, ‘prescription’ was replaced with ‘medication or medical supplies’.

### ***Housing***

We changed the question from “*What is your current housing?*” to “*What is your current housing situation?*” as the previous wording of the question was cumbersome according to 6 (3.1%) participants. There were no adequate options for 35 (17.9%) participants who lived with family or friends by choice (and not because of a lack of alternatives). To address this, we replaced the ‘own home’ and ‘rent’ options with ‘a place you or your family owns’ and ‘a place you or your family rents’. Some participants found the terms ‘couch surfing’ (12 participants) and ‘on the street’ (9 participants) stigmatizing, inappropriate or offensive. We replaced ‘couch surfing’ with ‘staying in someone else’s place because you have no alternative’ and ‘On the street’ with ‘Experiencing homelessness’. Nineteen (9.7%) participants felt that the options were limited and did not capture other living situations such as transitional housing or a nomadic lifestyle. We added additional options including supportive housing or group home, long-term care facility and correctional facility. We added “social housing, subsidized housing or rent-geared-to-income” as an option to this question and therefore removed the follow-up question “Is your current housing social housing, subsidized housing or rent-geared-to-income?” from the SPARK Tool. Seven (3.6%) participants indicated wanting to be asked about their living arrangements, specifically about who they live with. For example, if they rent, to specify that they live with roommates. One participant mentioned that the ‘rent’ option is a wide category that could include living with multiple roommates or alone in a “big fancy apartment”. We added a follow-up question asking “who do you live with? select all that apply”. For 18 (9.2%) participants, the options were inadequate and did not capture people who did not have to pay rent or people who were only able to make partial payment of the rent. ‘Not applicable, I do not have to pay rent or mortgage’ was added to address the first problem. The updated question does not yet capture participants who were only able to make partial rent payment, which is a limitation of the question.

### ***Transportation***

In the transportation question used in this study, “*In the past 12 months, did you avoid attending an important appointment because of the cost of transportation?*”, it was unclear to four (2.0%) participants what type of appointment the question was referring to. This has been clarified in the updated question. The updated question was adapted from the American Academy of Family Physicians (AAFP) Social Needs Screening Tool and the PREPARE Toolkit.<sup>29,30</sup>

### ***Utilities***

Eleven (5.6%) people were unsure what constituted a utility bill, therefore, in the revised question and the created descriptor, we provided examples of utilities for clarity. The descriptor

## *SPARK Tool: Development and cognitive testing*

explains ‘the specific utilities you pay for may depend on where you live’, indicating that electric, gas/oil and water bills are only examples of utility bills. There were no adequate options for 8 (4.1%) participants whose utilities are included in the rent. If these participants experienced difficulty paying a bill it would be captured in part three of housing question which asks the participant, “in the past 12 months, was there a time when you were not able to pay the mortgage or rent on time?” Further, we have expanded the ‘not applicable’ answer option to state “not applicable, I did not have to pay utility bills in the past 12 months or utilities already included in rent”.

### ***Social supports***

Social support is captured by two questions, both of which were moved to follow the utilities question (initially placed after housing) as some participants found the transition from housing to social supports abrupt. For the first question, ‘do you feel you have family or close friends who you can open up to?’, 10 (5.1%) participants, many of whom were ESL speakers, the term ‘open up to’ was difficult to understand. We therefore revised the question adding ‘confide in’ for clarity (i.e., ‘do you feel you have people who you can open up to or confide in’). Six (3.1%) participants felt unable to provide a *yes* or *no* response to social support questions, explaining that they may not be able to open up all the time or may be able to open up about some things but not others. To address this we added ‘yes, always or sometimes’ to the ‘yes’ option. In addition, ‘family or close friends’ was replaced with ‘people’ in the question as three participants said they may be able to open up to people not in those categories, e.g., pastor, teacher, etc. For the follow-up question, ‘are you able to rely on them if you need help (e.g., transportation, emotional or financial assistance)?’, 32 (16.4%) participants, felt the categories or examples provided in the question were too specific. For example, participants may be able to rely on the people they referred to in the first question emotionally but not financially. We removed the examples and left the question open to any kind of help. Some of these categories, e.g., transportation, are addressed in other questions.

### ***Employment***

The SPARK Tool administered in this study included three questions aimed at identifying individuals experiencing precarious employment. However, 34 (17.4%) participants felt unable to answer the employment questions which were not inclusive of all employment situations, including full-time, permanent, self-employed, did not capture people in between jobs or working multiple jobs, and failed to capture participants that were retired. To address this, we added two questions: ‘are you currently employed?’ and ‘are you currently looking for work?’ before asking the follow up questions about precarious employment. These revisions will capture individuals unemployed and looking for employment and therefore may help connect people to employment resources. Among the precarious employment questions, the first of which asked ‘are you employed in a casual, short-term, or temporary position?’, 12 (6.1%) participants were not familiar with the terms ‘casual’ and ‘short-term’. The umbrella terms for precarious work ‘temporary’ or ‘part-time’ were used instead. Examples of types of temporary or part-time employment were also included. Based on feedback from 4 (2.0%) participants who had multiple jobs, this question was revised to include ‘main job’ in the question to clarify that this is referring to primary source of employment. For the second precarious employment question, ‘do you feel fearful that you could be fired if you raise employment concerns?’, the phrase ‘raise employment concerns’ was confusing for 4 (2.0%) participants. To clarify this, we added examples of types of

## *SPARK Tool: Development and cognitive testing*

employment concerns. The question has also been modified to simplify the language. Based on feedback from research staff, 'fired' was replaced with 'negatively affected' in the question to account for people who may not be fired but endure negative consequences if or when they raise concerns. For the question about income instability, 'does your pay vary a lot from month to month?', we replaced 'vary' with 'change' for 12 (6.1%) participants who wanted the question reworded. Several of these participants also mentioned that their pay may change a lot due to other factors unrelated to precarious employment such as self-employment or shift work (e.g., nurses). This is a limitation that the updates have not addressed.

### **Discussion**

In this study, we conducted in-depth interviews with 195 diverse individuals from across four Canadian provinces, and through cognitive interviewing, evaluated a standard tool for collecting data on social determinants within primary care settings. For many participants, the value of this information being collected in typical healthcare settings was unclear, and hence, we included descriptors for each question. In general, the questions were understood, but participants highlighted a number of ways the questions could be changed to be even clearer and more inclusive. The findings from this study led to numerous ways to refine the questions.

Our findings are similar to other research on collecting sociodemographic data and screening for social needs in healthcare settings. Several previous studies have found that it is essential to clarify the reason for collecting data on social determinants at the outset.<sup>31-33</sup> Our findings regarding participants' interpretation of the question on race fits our past research on an earlier version of this question<sup>16</sup>, and confirms that the majority of individuals can identify an option that fits their self-identified race. Regarding the question on disabilities, our revised question is an improvement on an older version that contained a mixture of diagnoses and confusing terms<sup>17</sup>, and fits with work by Morris et al, on a patient-centred disability status question.<sup>34</sup> Our findings on the questions related to gender identity and sexual orientation fit previous work<sup>15</sup>, and suggest that new terms will continue to emerge that will need to be added as answer options to these questions.

A limitation of our study is that all interviews were conducted in English, despite advertising in numerous languages and offering translation services if required. Future research is needed to determine whether translations of these questions perform well or elicit new or different concerns from patients.

### **Conclusions**

In this work we have refined a set of 16 sociodemographic and social needs questions into a simple yet comprehensive and inclusive, 18-question tool that can be used in healthcare organizations to collect data on sociodemographics and social needs. The changes that were required were largely relating to wording, rather than content and demonstrated that consensus can be achieved. These questions require validation against accepted, standardized tools, and a future validation study is planned. Further work is required to enable community data

governance<sup>35</sup>, and to ensure implementation of the tool and well as use of its data is successful in a range of organizations.

### **Acknowledgments**

This project was funded by the Canadian Institutes for Health Research (CIHR). We would like to acknowledge Nada Dali and Ellah San Antonio, who helped with data collection in this study. We would also like to acknowledge Rose Wang for her contribution to the conceptualization of the study and management of the SPARK study team and advisory group.

WITHDRAWN  
see manuscript DOI for details

## References

1. World Health Organization. *Closing the Gap in a Generation: Health Equity through Action on the Social Determinants of Health.*; 2008. doi:10.1080/17441692.2010.514617
2. Public Health Agency of Canada (PHAC). What determines health? Published 2011. Accessed April 10, 2017. <http://www.phac-aspc.gc.ca/ph-sp/determinants/index-eng.php>
3. Krieger N. Theories for social epidemiology in the 21st century: an ecosocial perspective. *Int J Epidemiol.* 2001;30(4):668-677. doi:10.1093/ije/30.4.668
4. Wilkinson R, Marmot M. Social Determinants of Health: the Solid Facts. *World Heal Organ.* 2003;2(2):1-33. doi:10.1016/j.jana.2012.03.001
5. Marmot M, Bell R. Fair society, healthy lives. *Public Health.* 2012;126(SUPPL.1):S4. doi:10.1016/j.puhe.2012.05.014
6. Adler N, Ostrove J. Socioeconomic status and health: what we know and what we don't. PubMed Commons. *Ann N Y Acad Sci.* 1999;896:3-15. doi:10.1111/j.1749-6632.1999.tb08101.x
7. Adler NE, Stewart J. Health disparities across the lifespan: Meaning, methods, and mechanisms. *Ann N Y Acad Sci.* 2010;1186:5-23. doi:10.1111/j.1749-6632.2009.05337.x
8. *Physicians and Health Equity: Opportunities in Practice.*; 2013.
9. *Social Determinants of Health - What Doctors Can Do.*; 2011.
10. Daniel H, Bornstein S, Kane G. Addressing social determinants to improve patient care and promote health equity: An American College of Physicians position paper. *Ann Intern Med.* 2018;168(8):577-593. doi:10.2105/AJPH
11. *Best Advice - Social Determinants of Health.*; 2015.
12. Pinto AD, Glatstein-Young G, Mohamed A, Bloch G, Leung FH, Glazier RH. Building a Foundation to Reduce Health Inequities: Routine Collection of Sociodemographic Data in Primary Care. *J Am Board Fam Med.* 2016;29(3):348-355. doi:10.3122/jabfm.2016.03.150280
13. Toronto Public Health, St. Michael's, CAMH, Mount Sinai Hospital. *We Ask Because We Care: The Tri-Hospital + TPH Health Equity Data Collection Research Project Report.*; 2013.
14. Pinto AD, Shenfeld E, Aratangy T, et al. Routinely asking patients about income in primary care: a mixed-methods study. *Br J Gen Pract Open.* Published online 2021.
15. Pinto AD, Aratangy T, Abramovich A, et al. Routine collection of sexual orientation and gender identity data: a mixed-methods study. *Can Med Assoc J.* 2019;191(3):E63-E68. doi:10.1503/cmaj.180839
16. Kiran T, Sandhu P, Aratangy T, Devotta K, Lofters A, Pinto AD. Patient perspectives on routinely being asked about their race and ethnicity: qualitative study in primary care. *Can Fam Physician.* 2019;65:e363-e369.
17. Pinto AD, Shenfeld E, Lattanzio R, et al. Routine identification of patients with disabilities in primary care: a mixed-methods study. *Disabil Health J.* 2019;in press.
18. Williams-Roberts H, Neudorf C, Abonyi S, Cushon J, Muhajarine N. Facilitators and barriers of sociodemographic data collection in Canadian health care settings: A multisite case study evaluation. *Int J Equity Health.* 2018;17(1):1-10. doi:10.1186/s12939-018-0903-0
19. Statistics Canada. 2016 Census of Population. Statistics Canada Catalogue no. 98-400-X2016345. Published 2016. <https://www12.statcan.gc.ca/census-recensement/2016/dp->

*SPARK Tool: Development and cognitive testing*

- pd/dt-td/Rp-eng.cfm?TABID=2&Lang=E&APATH=3&DETAIL=0&DIM=0&FL=A&FREE=0&GC=0&GID=1235625&GK=0&GRP=1&PID=110212&PRID=10&PTYPE=109445&S=0&SHOWALL=0&SUB=0&Temporal=2016&THEME=118&VID=0&VNAMEE=&VNAM EF=&D1=0
20. Shafer K, Lohse B. How to conduct a cognitive interview: A nutrition education example. *US Dep Agric Natl Inst Food Agric*. Published online 2005.
  21. Willis GB. *Cognitive Interviewing: A Tool for Improving Questionnaire Design*. sage publications; 2004.
  22. Statistics Canada. 2016 Census of Population: Immigration and ethnocultural diversity. Statistics Canada. Published 2017. Accessed November 17, 2022. <https://www12.statcan.gc.ca/census-recensement/2016/ref/98-501/98-501-x2016008-eng.cfm>
  23. Canadian Institute for Health Information (CIHI). *A Path Forward: Toward Respectful Governance of First Nations, Inuit and Métis Data Housed at CIHI*.; 2020.
  24. The First Nations Information Governance Centre. *The First Nations Principles of OCAP*.; 2019.
  25. University of Manitoba Faculty of Health Sciences. *Framework for Research Engagement with First Nation, Metis and Inuit Peoples*.; 2019.
  26. Tagalik S. *Inuit Qaujimagajatuqangit: The Role of Indigenous Knowledge in Supporting Wellness in Inuit Communities in Nunavut*.; 2009.
  27. Canadian Institute of Health Information. *Guidance on the Use of Standards for Race-Based and Indigenous Identity Data Collection and Health Reporting in Canada*.; 2022.
  28. Brcic V, Eberdt C, Kaczorowski J. Development of a tool to identify poverty in a family practice setting: a pilot study. *Int J Family Med*. 2011;2011:1-7. doi:10.1155/2011/812182
  29. American Academy of Family Physicians. Social Needs Screening Tool. Published 2016. Accessed June 21, 2022. [https://www.aafp.org/dam/AAFP/documents/patient\\_care/everyone\\_project/patient-short-print.pdf](https://www.aafp.org/dam/AAFP/documents/patient_care/everyone_project/patient-short-print.pdf)
  30. National Association of Community Health Centers. *PRAPARE Implementation and Action Toolkit*.; 2016.
  31. Cook CAL, Freedman JA, Freedman LD, Arick RK, Miller ME. Screening for social and environmental problems in a VA primary care setting. *Heal Soc Work*. 1996;21(1):41-47. doi:10.1093/hsw/21.1.41
  32. Tong ST, Liaw WR, Kashiri PL, et al. Clinician experiences with screening for social needs in primary care. *J Am Board Fam Med*. 2018;31(3):351-363. doi:10.3122/jabfm.2018.03.170419
  33. Manchanda R, Gottlieb L. Upstream Risks Screening Tool & Guide. Published online 2015:0-4. <https://www.aamc.org/download/442878/data/chahandout1.pdf>
  34. Morris MA, Lagu T, Maragh-Bass A, Liesinger J, Griffin JM. Development of Patient-Centered Disability Status Questions to Address Equity in Care. *Jt Comm J Qual Patient Saf*. 2017;43(12):642-650. doi:10.1016/j.jcjq.2017.06.011
  35. Group BHEW. *Engagement, Governance, Access, and Protection (EGAP): A Data Governance Framework for Health Data Collected from Black Communities*.; 2021.

**Table 1: Demographics of participants**

| Characteristics                                                  | N (%)    |
|------------------------------------------------------------------|----------|
| <b>Language preference (translation)*</b>                        |          |
| Non-English/Non-French preference (translation would be helpful) | 14 (7)   |
| English/French preference (translation not needed)               | 178 (91) |
| No response                                                      | ≤ 5      |
| <b>Born in Canada</b>                                            |          |
| Yes                                                              | 120 (62) |
| No                                                               | 71 (36)  |
| No response                                                      | ≤ 5      |
| <b>Indigenous Identity**</b>                                     |          |
| Yes - First Nations                                              | 8 (4)    |
| Yes - Métis                                                      | ≤ 5      |
| Yes - Inuk/Inuit                                                 | ≤ 5      |
| No                                                               | 157 (81) |
| Data not collected (MB)                                          | 24 (12)  |
| No response                                                      | ≤ 5      |
| <b>Race**</b>                                                    |          |
| Arab, Middle Eastern or West Asian                               | 11 (6)   |
| Black                                                            | 17 (9)   |
| East Asian                                                       | 18 (9)   |
| Indigenous (First Nations, Metis, Inuk/Inuit)                    | 8 (4)    |
| Latino/Latina/Latinx                                             | ≤ 5      |
| South Asian or Indo-Caribbean                                    | 31 (16)  |
| Southeast Asian                                                  | 11 (6)   |
| White                                                            | 47 (24)  |
| Another Race Category                                            | 6 (3)    |
| Mixed Race                                                       | 16 (8)   |
| Data not collected (MB)                                          | 24 (12)  |
| No Response                                                      | ≤ 5      |
| <b>Sex at Birth</b>                                              |          |
| Female                                                           | 133 (68) |
| Male                                                             | 58 (30)  |
| Intersex                                                         | ≤ 5      |

*SPARK Tool: Development and cognitive testing*

|                                                                                      |          |
|--------------------------------------------------------------------------------------|----------|
| No response                                                                          | ≤ 5      |
| <b>Gender Identity</b>                                                               |          |
| Woman                                                                                | 126 (65) |
| Man                                                                                  | 58 (30)  |
| Transgender                                                                          | ≤ 5      |
| Gender fluid or Gender nonbinary                                                     | 8 (4)    |
| No response                                                                          | ≤ 5      |
| <b>Sexual Orientation</b>                                                            |          |
| Heterosexual ('straight', male/female relationships or two different binary genders) | 165 (85) |
| Gay                                                                                  | ≤ 5      |
| Lesbian                                                                              | ≤ 5      |
| Bisexual                                                                             | 9 (5)    |
| Queer or pansexual                                                                   | 10 (5)   |
| Another                                                                              | ≤ 5      |
| No response                                                                          | ≤ 5      |
| <b>Education</b>                                                                     |          |
| Some grade school                                                                    | ≤ 5      |
| Completed grade school (grade 1-8)                                                   | ≤ 5      |
| Some high school                                                                     | ≤ 5      |
| Completed high school (grade 9-12)                                                   | 9 (5)    |
| Trades Certificate/Diploma                                                           | 14 (7)   |
| Some college/university                                                              | 39 (20)  |
| College/university degree                                                            | 94 (48)  |
| Postgraduate degree                                                                  | 34 (17)  |
| No formal schooling                                                                  | ≤ 5      |
| No response                                                                          | ≤ 5      |
| <b>Housing</b>                                                                       |          |
| Own home                                                                             | 72 (37)  |
| Rent                                                                                 | 73 (37)  |
| Staying with friends or relatives because you have no alternative [couch surfing]    | 10 (5)   |
| Shelter                                                                              | ≤ 5      |
| On the street                                                                        | ≤ 5      |
| Other                                                                                | 36 (18)  |
| No response                                                                          | ≤ 5      |
| <b>Making ends meet</b>                                                              |          |
| Yes                                                                                  | 43 (22)  |



*SPARK Tool: Development and cognitive testing*

|             |          |
|-------------|----------|
| No          | 151 (77) |
| No response | ≤ 5      |

\* Based on responses to the SPARK Tool question: If it could be arranged, would translation into another language be helpful at your next appointment?

\*\* Note that one of the study sites, Manitoba, did not collect any race or indigenous identity data. MB had 24 participants. These are recorded under “Data not collected (MB)”

WITHDRAWN  
see manuscript DOI for details

Updated SPARK Tool

| Domain              | Question (If branching or skip logic* is not used)<br><br>*Skip logic is highly recommended                                                                                                                                                                                                                                                                                                                                                                                                                                                                                                                                                                         | If Branching or Skip Logic is used                                                                                                                                                                                                                                                                                                                                                                                                                                                                                                                                                               | Descriptor*<br><br>*If possible, we recommend adding hyperlinked to the front of the question or to the front the option (for applicable).<br><br>For example:<br><b>What was your sex at birth.</b><br><ul style="list-style-type: none"> <li>Female</li> <li>Male</li> <li>Intersex</li> <li>Do not know</li> <li>Prefer not to answer</li> </ul> <p><small>include descriptor with Why are we asking this question? And Understanding the question with definition of sex and birth</small></p> |
|---------------------|---------------------------------------------------------------------------------------------------------------------------------------------------------------------------------------------------------------------------------------------------------------------------------------------------------------------------------------------------------------------------------------------------------------------------------------------------------------------------------------------------------------------------------------------------------------------------------------------------------------------------------------------------------------------|--------------------------------------------------------------------------------------------------------------------------------------------------------------------------------------------------------------------------------------------------------------------------------------------------------------------------------------------------------------------------------------------------------------------------------------------------------------------------------------------------------------------------------------------------------------------------------------------------|----------------------------------------------------------------------------------------------------------------------------------------------------------------------------------------------------------------------------------------------------------------------------------------------------------------------------------------------------------------------------------------------------------------------------------------------------------------------------------------------------|
| <i>Demographics</i> |                                                                                                                                                                                                                                                                                                                                                                                                                                                                                                                                                                                                                                                                     |                                                                                                                                                                                                                                                                                                                                                                                                                                                                                                                                                                                                  |                                                                                                                                                                                                                                                                                                                                                                                                                                                                                                    |
| 1: Language         | <p>a) If available, would you prefer your healthcare appointments offered in another language?</p> <ul style="list-style-type: none"> <li>Yes</li> <li>No</li> <li>Do not know</li> <li>Prefer not to answer</li> </ul> <p>b) If yes, which language? (drop-down menu)</p> <ul style="list-style-type: none"> <li>English [if applicable]</li> <li>French [if applicable]</li> <li>Arabic</li> <li>Cantonese</li> <li>Dene</li> <li>German</li> <li>Greek</li> <li>Gujarati</li> <li>Hindi</li> <li>Inuktitut</li> <li>Italian</li> <li>Korean</li> <li>Mandarin</li> <li>Montagnais (Innu)</li> <li>Ojib-Cree</li> <li>Ojibway</li> <li>Persian (Farsi)</li> </ul> | <p>a) If available, would you prefer your healthcare appointments offered in another language?</p> <ul style="list-style-type: none"> <li>Yes → Go to question 1b</li> <li>No → Go to question 2</li> <li>Do not know → Go to question 2</li> <li>Prefer not to answer → Go to question 2</li> </ul> <p>b) [If yes in 1a] <b>Which language?</b> (drop-down menu)</p> <ul style="list-style-type: none"> <li>English [if applicable]</li> <li>French [if applicable]</li> <li>Arabic</li> <li>Cantonese</li> <li>Dene</li> <li>German</li> <li>Greek</li> <li>Gujarati</li> <li>Hindi</li> </ul> | <p><b>Why are we asking this question?</b></p> <p>This information lets us know who may want an interpreter or translation services at our clinic.</p> <p>This may also help us provide appropriate care to people who do not speak or read English or French.</p>                                                                                                                                                                                                                                 |

|                          |                                                                                                                                                                                                                                                                                                                                                                                                                                      |                                                                                                                                                                                                                                                                                                                                                                                                                                                                                                                                                                                                                                                                                                                                                                                                                                                |                                                                                                                                                                                                                           |
|--------------------------|--------------------------------------------------------------------------------------------------------------------------------------------------------------------------------------------------------------------------------------------------------------------------------------------------------------------------------------------------------------------------------------------------------------------------------------|------------------------------------------------------------------------------------------------------------------------------------------------------------------------------------------------------------------------------------------------------------------------------------------------------------------------------------------------------------------------------------------------------------------------------------------------------------------------------------------------------------------------------------------------------------------------------------------------------------------------------------------------------------------------------------------------------------------------------------------------------------------------------------------------------------------------------------------------|---------------------------------------------------------------------------------------------------------------------------------------------------------------------------------------------------------------------------|
|                          | <ul style="list-style-type: none"> <li>• Polish</li> <li>• Portuguese</li> <li>• Punjabi (Panjabi)</li> <li>• Romanian</li> <li>• Russian</li> <li>• Spanish</li> <li>• Tagalog (Pilipino, Filipino)</li> <li>• Tamil</li> <li>• Urdu</li> <li>• Vietnamese</li> <li>• Other (specify)_____</li> <li>• Not applicable, I would not prefer healthcare appointments offered in another language [remove if skip logic used]</li> </ul> | <ul style="list-style-type: none"> <li>• Inuktitut</li> <li>• Italian</li> <li>• Korean</li> <li>• Mandarin</li> <li>• Montagnais (Innu)</li> <li>• Ojib-Cree</li> <li>• Ojibway</li> <li>• Persian (Farsi)</li> <li>• Polish</li> <li>• Portuguese</li> <li>• Punjabi (Panjabi)</li> <li>• Romanian</li> <li>• Russian</li> <li>• Spanish</li> <li>• Tagalog (Pilipino, Filipino)</li> <li>• Tamil</li> <li>• Urdu</li> <li>• Vietnamese</li> <li>• Other (specify)_____</li> </ul> <p>Note: This represents the top non-Indigenous languages most spoken at home in Canada and top 5 Indigenous languages spoken in Canada <a href="#">according to the 2016 Census</a></p> <p>This list should be modified based on region. For example, using the top 20 languages most spoken at home in Ontario for SPARK Survey use in Ontario etc.</p> |                                                                                                                                                                                                                           |
| <b>2: Born in Canada</b> | <b>a) Were you born in Canada?</b> <ul style="list-style-type: none"> <li>• Yes</li> <li>• No</li> <li>• Do not know</li> </ul>                                                                                                                                                                                                                                                                                                      | <b>a) Were you born in Canada?</b> <ul style="list-style-type: none"> <li>• Yes → Go to question 2b below</li> <li>• No → Go to</li> </ul>                                                                                                                                                                                                                                                                                                                                                                                                                                                                                                                                                                                                                                                                                                     | <b>Why are we asking this question?</b><br>Providers may be able to refer people to appropriate newcomer services. This information lets us know who we serve at the clinic and may help us identify newcomers to Canada. |

|                                      |                                                                                                                                                                                                                                                                                                                                                                                                                                                                                                                                                                                           |                                                                                                                                                                                                                                                                                                                                                                                                                                                                                                                                                                                                                                                                                                            |                                                                                                                                                                                                                                                                                                                                                                                                                                                                                                                                                                                                                                                                                                                                                                                                                                                                                                                                                                                                                                                                                                                                                                                                                                                                                                                                                                                                                                           |
|--------------------------------------|-------------------------------------------------------------------------------------------------------------------------------------------------------------------------------------------------------------------------------------------------------------------------------------------------------------------------------------------------------------------------------------------------------------------------------------------------------------------------------------------------------------------------------------------------------------------------------------------|------------------------------------------------------------------------------------------------------------------------------------------------------------------------------------------------------------------------------------------------------------------------------------------------------------------------------------------------------------------------------------------------------------------------------------------------------------------------------------------------------------------------------------------------------------------------------------------------------------------------------------------------------------------------------------------------------------|-------------------------------------------------------------------------------------------------------------------------------------------------------------------------------------------------------------------------------------------------------------------------------------------------------------------------------------------------------------------------------------------------------------------------------------------------------------------------------------------------------------------------------------------------------------------------------------------------------------------------------------------------------------------------------------------------------------------------------------------------------------------------------------------------------------------------------------------------------------------------------------------------------------------------------------------------------------------------------------------------------------------------------------------------------------------------------------------------------------------------------------------------------------------------------------------------------------------------------------------------------------------------------------------------------------------------------------------------------------------------------------------------------------------------------------------|
|                                      | <ul style="list-style-type: none"> <li>• Prefer not to answer</li> </ul> <p><b>b) If no, when did you arrive?</b></p> <ul style="list-style-type: none"> <li>• less than 5 years ago</li> <li>• 5 to 9 years ago</li> <li>• 10 years ago or more</li> </ul>                                                                                                                                                                                                                                                                                                                               | <p>question 3</p> <ul style="list-style-type: none"> <li>• Do not know → Go to question 3</li> <li>• Prefer not to answer → Go to question 3</li> </ul> <p>b) [If yes in 2a] <b>When did you arrive?</b></p> <ul style="list-style-type: none"> <li>• less than 5 years ago</li> <li>• 5 to 9 years ago</li> <li>• 10 years ago or more</li> </ul>                                                                                                                                                                                                                                                                                                                                                         |                                                                                                                                                                                                                                                                                                                                                                                                                                                                                                                                                                                                                                                                                                                                                                                                                                                                                                                                                                                                                                                                                                                                                                                                                                                                                                                                                                                                                                           |
| <p><b>3: Indigenous Identity</b></p> | <p><b>a) Do you identify as an Indigenous person? Select all that apply:*</b></p> <ul style="list-style-type: none"> <li>• Yes, First Nations</li> <li>• Yes, Métis</li> <li>• Yes, Inuk/Inuit</li> <li>• Yes, another Indigenous identity (specify) _____</li> <li>• No</li> <li>• Do not know</li> <li>• Prefer not to answer</li> </ul> <p>*This data must be collected with engagement with local First Nations, Métis, and Inuit governance bodies in accordance with the First Nations OCAP, Métis OCAS, and Inuit Qaujimajatuqangit data governance and sovereignty principles</p> | <p><b>a) Do you identify as an Indigenous person? Select all that apply:*</b></p> <ul style="list-style-type: none"> <li>• Yes, First Nations → Go to question 3b</li> <li>• Yes, Métis → Go to question 3b</li> <li>• Yes, Inuk/Inuit → Go to question <b>3b and 3c</b></li> <li>• Yes, another Indigenous identity (specify) _____ → Go to question 3b</li> <li>• No → Go to question 4</li> <li>• Do not know → Go to question 4</li> <li>• Prefer not to answer → Go to question 4</li> </ul> <p>*This data must be collected with engagement with local First Nations, Métis, and Inuit governance bodies in accordance with the First Nations OCAP, Métis OCAS, and Inuit Qaujimajatuqangit data</p> | <p><b>Why are we asking this question?</b></p> <p>Your provider may use this to refer you to First Nations, Métis or Inuit resources and supports. This information lets us know who we serve and helps us meet patient needs.</p> <p>First Nations, Métis or Inuit identity data must be collected with local First Nations, Métis, and Inuit governance bodies. This way, the information is appropriately collected, stored, interpreted, used, or shared.<sup>1-4</sup> This is in line with the First Nations OCAP, Métis OCAS, and Inuit Qaujimajatuqangit data governance and sovereignty principles.<sup>1-4</sup></p> <p>This information helps identify and address differences in health outcomes between First Nations, Métis and Inuit people and other racial groups in Canada.<sup>5</sup></p> <p><b>Understanding the question:</b></p> <p>We ask “<b>Do you identify...</b>” in the question because we are asking you to tell us if you feel you are part of this group. This may include people who are Status or not Status.</p> <p><b>Truth and Reconciliation Commission of Canada</b> gives calls to action.<sup>5</sup> These calls to action can improve outcomes for First Nations, Métis, and Inuit peoples in Canada.<sup>5</sup></p> <p><b>Data sovereignty</b> means that each nation govern the collection, ownership, and application of its data. No matter where that data is stored<sup>1-4</sup>.</p> |

|                                                                                                                                                                                                                                                                                                            |                                                                                                                                                                                                                                              |                                                                                                                                                                                                                                                                                                                                                                                                                                                                                                                                                                                                                                                                                                                                                                                                                                                                                                                                                                                                                                                                                                                                                                                                                                                                                                                                                                                                                                                                                                                                                                                                                                                                                                                                                                                                                                                                                                                                                                                                                                                                                                                                                                                                                                                                                                                                                                                                                                                                                                                                                                                                                                                                                                 |                                                                                                                                                                                                                                                                                                                                      |
|------------------------------------------------------------------------------------------------------------------------------------------------------------------------------------------------------------------------------------------------------------------------------------------------------------|----------------------------------------------------------------------------------------------------------------------------------------------------------------------------------------------------------------------------------------------|-------------------------------------------------------------------------------------------------------------------------------------------------------------------------------------------------------------------------------------------------------------------------------------------------------------------------------------------------------------------------------------------------------------------------------------------------------------------------------------------------------------------------------------------------------------------------------------------------------------------------------------------------------------------------------------------------------------------------------------------------------------------------------------------------------------------------------------------------------------------------------------------------------------------------------------------------------------------------------------------------------------------------------------------------------------------------------------------------------------------------------------------------------------------------------------------------------------------------------------------------------------------------------------------------------------------------------------------------------------------------------------------------------------------------------------------------------------------------------------------------------------------------------------------------------------------------------------------------------------------------------------------------------------------------------------------------------------------------------------------------------------------------------------------------------------------------------------------------------------------------------------------------------------------------------------------------------------------------------------------------------------------------------------------------------------------------------------------------------------------------------------------------------------------------------------------------------------------------------------------------------------------------------------------------------------------------------------------------------------------------------------------------------------------------------------------------------------------------------------------------------------------------------------------------------------------------------------------------------------------------------------------------------------------------------------------------|--------------------------------------------------------------------------------------------------------------------------------------------------------------------------------------------------------------------------------------------------------------------------------------------------------------------------------------|
|                                                                                                                                                                                                                                                                                                            | governance and sovereignty principles                                                                                                                                                                                                        | <p><b>Indigenous:</b> In Canada, Indigenous peoples are First Nations, Métis, and Inuit. These are the original people of the land that is now Canada.<sup>6-5</sup></p> <p><b>First Nations</b> are the original people of the land that is now Canada. First Nations may or may not be Status (registered under the Indian Act) or live in a First Nations community.<sup>10</sup></p> <p><b>Métis</b> have their own history, culture, language, and territory. Métis are people born in the Métis Nation Homeland (Manitoba, Saskatchewan, Alberta, as well as parts of Ontario, British Columbia, and the Northwest Territories).<sup>11</sup></p> <p><b>Inuit</b> are the original people of the Northern region of Canada, Alaska, and Greenland. Their homeland included much of the land, water, and ice in the Arctic.<sup>7,12</sup></p> <ol style="list-style-type: none"> <li>1. Canadian Institute for Health Information. (2020). <a href="#">A path forward: toward respectful governance of First Nations, Inuit and Metis Data Housed at CIHI</a>. Accessed April 14, 2022.</li> <li>2. First Nations Information Governance Centre. <a href="#">The First Nations principles of OCAP®</a>. Accessed April 11, 2022.</li> <li>3. University of Manitoba Faculty of Health Sciences. (2019) <a href="#">Framework for Research Engagement with First Nation, Metis and Inuit Peoples</a>. Accessed April 11, 2022.</li> <li>4. Tagalik S. (2009–2010) National Collaborating Centre for Aboriginal Health. <a href="#">Inuit Qaujimajatuqangit: The Role of Indigenous Knowledge in Supporting Wellness in Inuit Communities in Nunavut</a>. Accessed April 11, 2022.</li> <li>5. Truth and Reconciliation Commission of Canada. (2015) <a href="#">Truth and Reconciliation Commission of Canada: Calls to Action</a>. Accessed April 11, 2022.</li> <li>6. Statistics Canada. (2021). <a href="#">Indigenous group of person</a>. Accessed April 11, 2022</li> <li>7. The Canadian Encyclopedia. <a href="#">Indigenous Peoples in Canada</a>. Accessed April 11, 2022</li> <li>8. United Nations. <a href="#">Indigenous Peoples at the United Nations</a>. Accessed April 11, 2022</li> <li>9. United Nations. <a href="#">United Nations Declaration on the Rights of Indigenous Peoples</a>. 2018</li> <li>10. Government of Canada. (2014) <a href="#">First Nations People in Canada</a>. Accessed April 11, 2022</li> <li>11. Libraries and Archives Canada. Government of Canada. (2021) <a href="#">First Nations People in Canada</a>. Accessed April 11, 2022</li> <li>12. Government of Canada. (2021) <a href="#">Inuit</a>. Accessed April 11, 2022</li> </ol> |                                                                                                                                                                                                                                                                                                                                      |
| <p><b>b) If yes, are you Status (Registered or Treaty Indian as defined by the Indian Act of Canada)?*</b></p> <ul style="list-style-type: none"> <li>• Yes, Status Indian (Registered or Treaty)</li> <li>• No</li> <li>• Not applicable, I am not an Indigenous person [remove if skip logic]</li> </ul> | <p>b) [If yes, to any Indigenous option in 4a] <b>Are you Status (Registered or Treaty Indian as defined by the Indian Act of Canada)?</b></p> <ul style="list-style-type: none"> <li>• Yes, Status Indian (Registered or Treaty)</li> </ul> |                                                                                                                                                                                                                                                                                                                                                                                                                                                                                                                                                                                                                                                                                                                                                                                                                                                                                                                                                                                                                                                                                                                                                                                                                                                                                                                                                                                                                                                                                                                                                                                                                                                                                                                                                                                                                                                                                                                                                                                                                                                                                                                                                                                                                                                                                                                                                                                                                                                                                                                                                                                                                                                                                                 | <p><b>Why are we asking this question?</b></p> <p>If you are Status, your provider may be able to refer you to more services.</p> <p>You may be able to receive Non-Insured Health Benefits. This may include:</p> <ul style="list-style-type: none"> <li>• some drugs</li> <li>• vision care</li> <li>• medical supplies</li> </ul> |

|                       |                                                                                                                                                                                                                                                                                                                                                                                                                                                                                                                                                   |                                                                                                                                                                                                                                                                                                                                                                                                                                                                      |                                                                                                                                                                                                                                                                                                                                                                                                                                                                                                                                                                                                                                                                                                                                                                                                                                                                                                                                                                                                                                         |
|-----------------------|---------------------------------------------------------------------------------------------------------------------------------------------------------------------------------------------------------------------------------------------------------------------------------------------------------------------------------------------------------------------------------------------------------------------------------------------------------------------------------------------------------------------------------------------------|----------------------------------------------------------------------------------------------------------------------------------------------------------------------------------------------------------------------------------------------------------------------------------------------------------------------------------------------------------------------------------------------------------------------------------------------------------------------|-----------------------------------------------------------------------------------------------------------------------------------------------------------------------------------------------------------------------------------------------------------------------------------------------------------------------------------------------------------------------------------------------------------------------------------------------------------------------------------------------------------------------------------------------------------------------------------------------------------------------------------------------------------------------------------------------------------------------------------------------------------------------------------------------------------------------------------------------------------------------------------------------------------------------------------------------------------------------------------------------------------------------------------------|
|                       | <p>used]</p> <ul style="list-style-type: none"> <li>Do not know</li> <li>Prefer not to answer</li> </ul> <p>*This data must be collected with engagement with local First Nations, Métis, and Inuit governance bodies in accordance with the First Nations OCAP, Métis OCAS, and Inuit Qaujimajatuqangit data governance and sovereignty principles.</p>                                                                                                                                                                                          | <ul style="list-style-type: none"> <li>No</li> <li>Do not know</li> <li>Prefer not to answer</li> </ul> <p>*This data must be collected with engagement with local First Nations, Métis, and Inuit governance bodies in accordance with the First Nations OCAP, Métis OCAS, and Inuit Qaujimajatuqangit data governance and sovereignty principles.</p>                                                                                                              | <ul style="list-style-type: none"> <li>medical transportation</li> </ul> <p><b>Understanding the question:</b></p> <p><b>Status (Registered or Treaty Indian)</b> is a person registered under the Indian Act of Canada. People with status may receive health services under the Non-Insured Health Benefits Program.<sup>1,2</sup></p> <ol style="list-style-type: none"> <li>Government of Canada. (2022). <a href="#">About Indian Status</a>. Accessed April 14, 2022</li> <li>Statistics Canada. <a href="#">Registered or Treaty Indian status of person</a>. 2021. Accessed April 11, 2022</li> </ol>                                                                                                                                                                                                                                                                                                                                                                                                                           |
|                       | <p>c) <b>If yes, Inuk/Inuit, are you a member of an Inuit land claims agreement?*</b></p> <ul style="list-style-type: none"> <li>Yes</li> <li>No</li> <li>Not applicable, I am not an Indigenous person [remove if skip logic used]</li> <li>Do not know</li> <li>Prefer not to answer</li> </ul> <p>*This data must be collected with engagement with local First Nations, Métis, and Inuit governance bodies in accordance with the First Nations OCAP, Métis OCAS, and Inuit Qaujimajatuqangit data governance and sovereignty principles.</p> | <p>c) [If yes, Inuk/Inuit in 4a] <b>Are you a member of an Inuit land claims agreement?</b></p> <ul style="list-style-type: none"> <li>Yes</li> <li>No</li> <li>Do not know</li> <li>Prefer not to answer</li> </ul> <p>*This data must be collected with engagement with local First Nations, Métis, and Inuit governance bodies in accordance with the First Nations OCAP, Métis OCAS, and Inuit Qaujimajatuqangit data governance and sovereignty principles.</p> | <p><b>Why are we asking this question?</b></p> <p>If you are a member of an Inuit land claims agreement your provider may refer you to supports and services that may help you.</p> <p>You may be able to receive Non-Insured Health Benefits. This may include:</p> <ul style="list-style-type: none"> <li>some drugs</li> <li>vision care</li> <li>medical supplies</li> <li>medical transportation</li> </ul> <p><b>Understanding the Question:</b></p> <p>A member of an <b>Inuit land claims agreement</b> is beneficiary of: Nunavut Land Claim Agreement, or Inuvialuit Final Agreement.</p> <p>You may have been automatically registered and received your territorial health care card.</p> <p>If you live outside of the land claim settlement area you can register with a land claim organization to receive benefits.</p> <ol style="list-style-type: none"> <li>Government of Canada. <a href="#">Your Health Benefits – A Guide for Inuit to Access Non-Insured Health Benefits</a>. Accessed April 22, 2022</li> </ol> |
| <p><b>4: Race</b></p> | <p><b>In our society, people are often described by their race or racial background. Our race may influence the way we are treated by</b></p>                                                                                                                                                                                                                                                                                                                                                                                                     | <p>Not Applicable</p>                                                                                                                                                                                                                                                                                                                                                                                                                                                | <p><b>Why are we asking this question?</b></p> <p>We are asking this question on race to help us know who we serve at the clinic. We're interested in monitoring the experience our clients have in</p>                                                                                                                                                                                                                                                                                                                                                                                                                                                                                                                                                                                                                                                                                                                                                                                                                                 |

**individuals and institutions, and this may affect our health. Which category(ies) best describes you? Select all that apply:**

- Black (e.g., African, African Canadian, Afro-Caribbean descent)
- East Asian (e.g., Chinese, Japanese, Korean, Taiwanese descent)
- Indigenous (e.g., First Nations, Métis, Inuk/Inuit)\*
- Latin American (e.g., Hispanic or Latin American descent)
- Middle Eastern (e.g., Arab, Persian, West Asian descent (e.g., Afghan, Egyptian, Iranian, Kurdish, Lebanese, Turkish))
- South Asian (e.g., South Asian descent (e.g., Bangladeshi, Indian, Indo-Caribbean, Pakistani, Sri Lankan)
- Southeast Asian (e.g., Cambodian, Filipino, Indonesian, Thai, Vietnamese, or other Southeast Asian descent)
- White (e.g., European descent)
- Another race category (please specify)

- Do not know
- Prefer not to answer

\*This data must be collected with engagement with local First Nations, Métis, and Inuit governance bodies in accordance with the First Nations OCAP, Métis OCAS, and Inuit Qaujimajatuqangit data governance and

the clinic to ensure that everyone has a positive experience regardless of their racial background.

This information may also help us identify and address differences in health outcomes experienced by different racial groups.

### **Understanding the question:**

**Race** is a term used to classify people into group usually based on observable physical characteristics (for example, skin colour) but can also include characteristics such as accent or dress.<sup>1,2,3</sup>

Although these differences or groupings are created by the society we live in, racial categories can have significant consequences for people's lives, including unfair and unjust treatment by individuals and institutions. This is what we call racism.

Race should not be confused with ethnicity.

**Ethnicity** refers to groups of people who share a common culture or ancestry. They may also share a common language, religion, geographic origin, nationality, cultural traditions, migration history other commonalities.<sup>1,2</sup>

**Mixed race** individuals are encouraged to select more than one racial group.

If you are unsure what to select, you can choose "Another" and specify what racial group(s) best describe you.

This question was adapted from the March 2022 CIHI Race-based standards.<sup>1</sup>

1. Canadian Institute for Health Information (2022) [Guidance on Use of Standards for Race-Based and Indigenous Identity Data Collection and Health Reporting in Canada](#) Ottawa, ON: CIHI. Accessed April 5, 2022
2. Torontohealthequity.ca. [Measuring Health Equity: Demographic Data Collection in Health Care](#). Accessed April 5, 2022
3. Government of Ontario Anti-Racism Directorate. [Data Standards for the Identification and Monitoring of Systemic Racism](#). Accessed April 5, 2022

|                                    |                                                                                                                                                                                                                                                                                                                                                                                                                                                                                                                                                                                                                                                                                                                                                                                                                                                                                                                                                                                                                                                           |                |                                                                                                                                                                                                                                                                                                                                                                                                                                                                                                                                                                                                                                                                                                                                                                                                                                                                                                                                                                                                                              |
|------------------------------------|-----------------------------------------------------------------------------------------------------------------------------------------------------------------------------------------------------------------------------------------------------------------------------------------------------------------------------------------------------------------------------------------------------------------------------------------------------------------------------------------------------------------------------------------------------------------------------------------------------------------------------------------------------------------------------------------------------------------------------------------------------------------------------------------------------------------------------------------------------------------------------------------------------------------------------------------------------------------------------------------------------------------------------------------------------------|----------------|------------------------------------------------------------------------------------------------------------------------------------------------------------------------------------------------------------------------------------------------------------------------------------------------------------------------------------------------------------------------------------------------------------------------------------------------------------------------------------------------------------------------------------------------------------------------------------------------------------------------------------------------------------------------------------------------------------------------------------------------------------------------------------------------------------------------------------------------------------------------------------------------------------------------------------------------------------------------------------------------------------------------------|
|                                    | sovereignty principles.                                                                                                                                                                                                                                                                                                                                                                                                                                                                                                                                                                                                                                                                                                                                                                                                                                                                                                                                                                                                                                   |                |                                                                                                                                                                                                                                                                                                                                                                                                                                                                                                                                                                                                                                                                                                                                                                                                                                                                                                                                                                                                                              |
| <b>5: People with Disabilities</b> | <p><b>Do you currently experience any of the following due to a <u>severe and persistent physical or mental condition</u>? Select all that apply:</b></p> <ul style="list-style-type: none"> <li>• Difficulty seeing (e.g., severe vision impairment)</li> <li>• Difficulty hearing (e.g., severe hearing loss)</li> <li>• Difficulty with walking or climbing (e.g., severe mobility issues)</li> <li>• Difficulty remembering or with concentration (e.g., severe memory loss or disorientation)</li> <li>• Difficulty with personal hygiene (e.g., physically unable or lack motivation to shower)</li> <li>• Difficulty with activities for daily living (e.g., physically unable or lack motivation to: e.g., eat, get out of bed, work)</li> <li>• Difficulty with communicating (e.g., severe speech impairment, trouble generating words)</li> <li>• Difficulty with comprehension (e.g., severe learning disability, trouble understanding words)</li> <li>• None of the above</li> <li>• Do not know</li> <li>• Prefer not to answer</li> </ul> | Not Applicable | <p><b>Why are we asking this question?</b></p> <p>Your provider may use this to inform the care you receive.</p> <p>Your provider may also use this to refer you to appropriate services that may be helpful to you.</p> <p>This information may help us provide better accommodations for people living with disabilities. And this can improve their overall access to health care.</p> <p><b>Understanding the question:</b></p> <p>“<b>Severe and persistent condition</b>” is about long term conditions or disabilities that affect day-to-day activities.</p> <p>The condition <b>does not have to be diagnosed</b> by your provider.</p> <p><i>‘Difficulty seeing or hearing’</i> is not asking about conditions that can be corrected with aids such as glasses or hearing aids.</p> <p><i>‘Difficulty with communication’</i> is asking about people who have this difficulty because of a physical or mental condition and not because of other things such as language barriers or reading or writing level.</p> |
| <b>6: Sex at Birth</b>             | <p><b>What was your sex at birth?</b></p> <ul style="list-style-type: none"> <li>• Female</li> <li>• Male</li> <li>• Intersex</li> <li>• Do not know</li> <li>• Prefer not to answer</li> </ul>                                                                                                                                                                                                                                                                                                                                                                                                                                                                                                                                                                                                                                                                                                                                                                                                                                                           | Not Applicable | <p><b>Why are we asking this question?</b></p> <p>This information lets us know who we serve at the clinic and how well we are meeting patient needs. This information can also help us screen for and prevent some health conditions.</p> <p>This question gives you a space to share your identity and to help avoid assumptions about you</p>                                                                                                                                                                                                                                                                                                                                                                                                                                                                                                                                                                                                                                                                             |



|                                  |                                                                                                                                                                                                                                                                                                                                                                                 |                       |                                                                                                                                                                                                                                                                                                                                                                                                                                                                                                                                                                                                                                                                                                                                                                                                                                                                                                                                                                                                                                                                                                                                                                                                                                                                                                                                                                                                                                  |
|----------------------------------|---------------------------------------------------------------------------------------------------------------------------------------------------------------------------------------------------------------------------------------------------------------------------------------------------------------------------------------------------------------------------------|-----------------------|----------------------------------------------------------------------------------------------------------------------------------------------------------------------------------------------------------------------------------------------------------------------------------------------------------------------------------------------------------------------------------------------------------------------------------------------------------------------------------------------------------------------------------------------------------------------------------------------------------------------------------------------------------------------------------------------------------------------------------------------------------------------------------------------------------------------------------------------------------------------------------------------------------------------------------------------------------------------------------------------------------------------------------------------------------------------------------------------------------------------------------------------------------------------------------------------------------------------------------------------------------------------------------------------------------------------------------------------------------------------------------------------------------------------------------|
|                                  |                                                                                                                                                                                                                                                                                                                                                                                 |                       | <p>or your healthcare.</p> <p><b>Understanding the question:</b></p> <p><b>Sex at Birth</b> is often recorded at a person’s birth and is usually based on a person’s reproductive system and other physical traits.<sup>1</sup></p> <p>While <b>Gender Identity</b> is a person’s sense of themselves relating to gender, be it male, female, combination of both, or neither.<sup>2</sup></p> <p>Gender can be fluid and may change over time.<sup>3</sup></p> <p><b>Intersex</b> refers to people born with differences in their reproductive features<sup>2,4</sup> that may not be easily characterized as male or female.<sup>5</sup></p> <ol style="list-style-type: none"> <li>1. Statistics Canada, Government of Canada (2021). <a href="#">Sex at birth person</a> Accessed April 18, 2022</li> <li>2. Human Rights Campaign (2011). <a href="#">Glossary of Terms - Human Rights Campaign</a>. Accessed April 18, 2022</li> <li>3. Torontohealthequity.ca. <a href="#">Measuring Health Equity: Demographic Data Collection in Health Care</a>. Accessed April 18, 2022</li> <li>4. Ucdavis.edu. (2014). <a href="#">LGBTQIA Resource Center Glossary   LGBTQIA Resource Center</a>. Accessed April 18, 2022</li> <li>5. Ohrc.on.ca. (2014). <a href="#">Appendix B: Glossary for understanding gender identity and expression   Ontario Human Rights Commission (ohrc.on.ca)</a>. Accessed April 18, 2022</li> </ol> |
| <p><b>7: Gender Identity</b></p> | <p><b>What is your gender identity?</b></p> <ul style="list-style-type: none"> <li>• Woman</li> <li>• Man</li> <li>• Transgender man</li> <li>• Transgender woman</li> <li>• Gender fluid or non-binary</li> <li>• Two-Spirit (a term by and for Indigenous peoples)</li> <li>• Prefer to self-describe _____</li> <li>• Do not know</li> <li>• Prefer not to answer</li> </ul> | <p>Not Applicable</p> | <p><b>Why are we asking this question?</b></p> <p>This information lets us know who we serve at the clinic and how well we’re meeting patient needs.</p> <p>It helps us understand the range of gender identities that people at our clinic may experience.</p> <p>This question gives you a space to share your identity and to help avoid assumptions about you or your healthcare.</p> <p><b>Understanding the question:</b></p> <p><b>Gender Identity</b> is a person’s sense of themselves relating to gender, be it male, female, a combination of both, or neither.<sup>1</sup></p> <p>Gender can be fluid and may change over time.<sup>2</sup></p> <p><b>Sex at Birth</b> is often recorded at a person’s birth and is usually based on a person’s reproductive system and other physical traits.<sup>3</sup></p>                                                                                                                                                                                                                                                                                                                                                                                                                                                                                                                                                                                                       |

|                                     |                                                                                                                                                                                                                                                                                                                                                                                                                                                   |                       |                                                                                                                                                                                                                                                                                                                                                                                                                                                                                                                                                                                                                                                                                                                                                                                                                                                                                                                                                                                                                                                                                                                                                                                                                                                                                                                                                                                                                                                                                                                                                                                                                                                                                                                                                                                                                                                                                                                                                                                                                                                                                                                                                                                     |
|-------------------------------------|---------------------------------------------------------------------------------------------------------------------------------------------------------------------------------------------------------------------------------------------------------------------------------------------------------------------------------------------------------------------------------------------------------------------------------------------------|-----------------------|-------------------------------------------------------------------------------------------------------------------------------------------------------------------------------------------------------------------------------------------------------------------------------------------------------------------------------------------------------------------------------------------------------------------------------------------------------------------------------------------------------------------------------------------------------------------------------------------------------------------------------------------------------------------------------------------------------------------------------------------------------------------------------------------------------------------------------------------------------------------------------------------------------------------------------------------------------------------------------------------------------------------------------------------------------------------------------------------------------------------------------------------------------------------------------------------------------------------------------------------------------------------------------------------------------------------------------------------------------------------------------------------------------------------------------------------------------------------------------------------------------------------------------------------------------------------------------------------------------------------------------------------------------------------------------------------------------------------------------------------------------------------------------------------------------------------------------------------------------------------------------------------------------------------------------------------------------------------------------------------------------------------------------------------------------------------------------------------------------------------------------------------------------------------------------------|
|                                     |                                                                                                                                                                                                                                                                                                                                                                                                                                                   |                       | <p><b>Gender non-binary</b> describes a person who may experience a gender identity that is neither exclusively woman or man, is a combination of woman and man or is between or beyond genders.<sup>4</sup></p> <p>Non-binary can also be used as an umbrella term for identities that are gender fluid, moving between and through identities.<sup>1</sup></p> <p><b>Two-Spirit</b> is a term used by Indigenous peoples to self-describe and express diverse sexual, gender and/or spiritual identities.<sup>5</sup> It is a way for Indigenous peoples to reconnect with their traditional languages, ways, and cultures.<sup>6</sup></p> <p><b>Transgender</b> or trans is an umbrella term for people whose gender identity or expression is different from conventional or cultural expectations based on the sex they were assigned at birth.<sup>7,8</sup></p> <ol style="list-style-type: none"> <li>1. Ohrc.on.ca. (2014). <a href="#">Appendix B: Glossary for understanding gender identity and expression   Ontario Human Rights Commission</a>. Accessed April 18, 2022</li> <li>2. Torontohealthequity.ca. <a href="#">Measuring Health Equity: Demographic Data Collection in Health Care</a>. Accessed April 18, 2022</li> <li>3. Statistics Canada, Government of Canada (2021). <a href="#">Sex at birth of person</a>. Accessed April 18, 2022</li> <li>4. Losty, M. and O'Connor, J. (2017). <a href="#">Falling outside of the 'nice little binary box': a psychoanalytic exploration of the non-binary gender identity</a>. <i>Psychoanalytic Psychotherapy</i>, 32(1), pp.40–6</li> <li>5. Knudson, S. and Hahn, D. (2019). <a href="#">Committing sociology: critical perspectives on our social world</a>. Toronto: Pearson Canada.</li> <li>6. Fewster, P.H. (2018). <a href="#">Researching for LGBTQ Health</a>. <a href="#">Lgbtqhealth.ca</a>. Accessed April 18, 2022</li> <li>7. Ucdavis.edu. (2014). <a href="#">LGBTQIA Resource Center Glossary   LGBTQIA Resource Center</a>. Accessed April 18, 2022</li> <li>8. Human Rights Campaign (2011). <a href="#">Glossary of Terms - Human Rights Campaign</a>. Accessed April 18, 2022</li> </ol> |
| <p><b>8: Sexual Orientation</b></p> | <p><b>Which category(ies) best describe your sexual orientation? Select all that apply:</b></p> <ul style="list-style-type: none"> <li>• Asexual or Aromantic</li> <li>• Bisexual</li> <li>• Demisexual</li> <li>• Homosexual or Gay</li> <li>• Heterosexual or Straight</li> <li>• Lesbian</li> <li>• Pansexual</li> <li>• Queer</li> <li>• Two-Spirit (a term by and for Indigenous peoples)</li> <li>• Prefer to self-describe_____</li> </ul> | <p>Not Applicable</p> | <p><b>Why are we asking this question?</b></p> <p>This information lets us know who we serve at the clinic. It helps us understand the range of orientations that people at our clinic may experience.</p> <p>This question gives you a space to share your orientation and to help avoid assumptions about you or your healthcare.</p> <p><b>Understanding the question:</b></p> <p><b>Sexual orientation</b> is a term for the emotional, physical, romantic, sexual, and spiritual attraction, non-attraction, desire, or affection for another person.<sup>1</sup></p>                                                                                                                                                                                                                                                                                                                                                                                                                                                                                                                                                                                                                                                                                                                                                                                                                                                                                                                                                                                                                                                                                                                                                                                                                                                                                                                                                                                                                                                                                                                                                                                                          |

- Do not know
- Prefer not to answer

**Aromantic** describes a romantic identity for people who do not experience romantic attraction to people of any gender but may still have sexual attraction to other people.<sup>2</sup>

**Asexual** describes people who do not experience sexual attraction to people of any gender but may still experience romantic attractions to other people.<sup>1,3</sup>

**Bisexual** describes a person whose primary emotional, romantic, or sexual attraction is toward people of both the same and different gender.

**Demisexual** describes a person who feels sexual attraction only to people that they have an emotional bond with.<sup>3</sup>

**Homosexual or Gay** describes a person whose primary emotional, romantic, or sexual attraction is toward people of the same gender.<sup>1</sup>

**Heterosexual or Straight** describes a person whose primary emotional, romantic, or sexual attraction is toward people of an opposite gender

**Lesbian** describes a person, usually a woman, whose primary emotional, romantic, or sexual attraction is toward people of the same gender.<sup>1</sup>

**Pansexual** describes a person who has emotional, romantic, or sexual desire for people of all genders and sexes.<sup>1</sup>

**Queer** is a term used to express a range of identities and orientations that are beyond the mainstream.<sup>1</sup>

**Two-Spirit** is a term used by Indigenous peoples to self-describe and express diverse sexual identities as having both a masculine and feminine spirit.<sup>4</sup> It is a way for Indigenous peoples to reconnect with their traditional languages, ways, and cultures.<sup>5</sup>

1. Human Rights Campaign (2011). [Glossary of Terms - Human Rights Campaign](#). Accessed April 18, 2022
2. Suen, L.W., Lunn, M.R., Katuzny, K., ... & Obedin-Maliver, J. (2020). [What Sexual and Gender Minority People Want Researchers to Know About Sexual Orientation and Gender Identity Questions: A Qualitative Study](#). *Archives of Sexual Behavior*, 49(7), pp.2301–2318.

3. Ucdavis.edu. (2014). [LGBTQIA Resource Center Glossary | LGBTQIA Resource Center](#). Accessed April 18, 2022
4. Knudson, S. and Hahn, D. (2019). *Committing sociology: critical perspectives on our social world*. Toronto: Pearson Canada.
5. Fewster, P.H. (2018). *Researching for LGBTQ Health*. [Lgbtqhealth.ca](#). Accessed April 18, 2022

**Social Needs**

|                                   |                                                                                                                                                                                                                                                                                                                                                                                                                                                                                                                                                                                                                                                                                         |                       |                                                                                                                                                                                                                                                                                                                                                                                                                                                                                                                                                                                                                                                                                                                                                                                                                                                                                                                                                                                                                                                                                                                                                             |
|-----------------------------------|-----------------------------------------------------------------------------------------------------------------------------------------------------------------------------------------------------------------------------------------------------------------------------------------------------------------------------------------------------------------------------------------------------------------------------------------------------------------------------------------------------------------------------------------------------------------------------------------------------------------------------------------------------------------------------------------|-----------------------|-------------------------------------------------------------------------------------------------------------------------------------------------------------------------------------------------------------------------------------------------------------------------------------------------------------------------------------------------------------------------------------------------------------------------------------------------------------------------------------------------------------------------------------------------------------------------------------------------------------------------------------------------------------------------------------------------------------------------------------------------------------------------------------------------------------------------------------------------------------------------------------------------------------------------------------------------------------------------------------------------------------------------------------------------------------------------------------------------------------------------------------------------------------|
| <p><b>9: Education</b></p>        | <p><b>What is your current level of education?</b></p> <ul style="list-style-type: none"> <li>• No formal schooling</li> <li>• Grade school (grade 1-8)</li> <li>• Some high school, but did not graduate</li> <li>• High school or high school equivalency certificate (grade 9-12)</li> <li>• Completed Registered Apprenticeship or other trades certificate or diploma (or ongoing)</li> <li>• College, CEGEP or other non-university certificate or diploma (or ongoing)</li> <li>• Undergraduate degree or some university</li> <li>• Postgraduate degree or professional designation (e.g., Master’s, PhD, MD)</li> <li>• Do not know</li> <li>• Prefer not to answer</li> </ul> | <p>Not Applicable</p> | <p><b>Why are we asking this question?</b></p> <p>Your provider may use this information to know how well you are able to read and understand health information such as medication labels and instructions.<sup>1</sup></p> <p>Your provider may also use this to connect you with supports that may be helpful to you.</p> <p>A person’s education level is related to their ability to understand basic health information and access health services. And these may affect their health.<sup>1</sup></p> <p><b>Understanding the question:</b></p> <p>The term ‘<i>some</i>’ in ‘<i>Some high school</i>’ means your high school education may be in progress or stopped.</p> <p>The term ‘<i>ongoing</i>’ means schooling or training in progress.</p> <p>If you received your education by home-schooling, please select the matching grade level you have completed.</p> <p>1. Canadian Institute for Health Information (2018) <a href="#">In Pursuit of Health Equity: Defining Stratifies for Measuring Health Inequality — A Focus on Age, Sex, Gender, Income, Education and Geographic Location</a>. Ottawa, ON: CIHI. Accessed April 2022</p> |
| <p><b>10: Income/Finances</b></p> | <p><b>Do you currently have difficulty paying for basic needs?</b></p> <ul style="list-style-type: none"> <li>• Yes</li> <li>• No</li> <li>• Not applicable, I do not have to pay for basic needs</li> <li>• Do not know</li> <li>• Prefer not to answer</li> </ul>                                                                                                                                                                                                                                                                                                                                                                                                                     | <p>Not Applicable</p> | <p><b>Why are we asking this question?</b></p> <p>Your provider may use this to refer you to income resources and supports that may be helpful to you.</p> <p>Low income has been shown to negatively affect mental and physical health.<sup>1-4</sup></p> <p><b>Understanding the question:</b></p> <p><b>Basic Needs</b> are things that a person requires to</p>                                                                                                                                                                                                                                                                                                                                                                                                                                                                                                                                                                                                                                                                                                                                                                                         |

|                                     |                                                                                                                                                                                                                                                                                                                                                                                                                                                                                                                                                                                                                                             |                       |                                                                                                                                                                                                                                                                                                                                                                                                                                                                                                                                                                                                                                                                                                                                                                                                                                                                                                                                                                                                                                                                                                                                                                                                                                                                                                                                                                                                                                                                                                     |
|-------------------------------------|---------------------------------------------------------------------------------------------------------------------------------------------------------------------------------------------------------------------------------------------------------------------------------------------------------------------------------------------------------------------------------------------------------------------------------------------------------------------------------------------------------------------------------------------------------------------------------------------------------------------------------------------|-----------------------|-----------------------------------------------------------------------------------------------------------------------------------------------------------------------------------------------------------------------------------------------------------------------------------------------------------------------------------------------------------------------------------------------------------------------------------------------------------------------------------------------------------------------------------------------------------------------------------------------------------------------------------------------------------------------------------------------------------------------------------------------------------------------------------------------------------------------------------------------------------------------------------------------------------------------------------------------------------------------------------------------------------------------------------------------------------------------------------------------------------------------------------------------------------------------------------------------------------------------------------------------------------------------------------------------------------------------------------------------------------------------------------------------------------------------------------------------------------------------------------------------------|
|                                     |                                                                                                                                                                                                                                                                                                                                                                                                                                                                                                                                                                                                                                             |                       | <p>achieve and maintain physical and mental well-being and include food, water, shelter, and clothing.<sup>2-4</sup></p> <ol style="list-style-type: none"> <li>1. National Association of Community Health Centre, Inc, Association of Asian Pacific Community Health Organization and the Oregon primary Care Association. (2019). <a href="#">PRAPARE Protocol for Responding to and Assessing Patients' Assets, Risks and Experiences. Implementation and Action Toolkit</a>. Accessed April 14, 2022.</li> <li>2. Collin, C. and Campbell, B. (2008). <a href="#">Measuring Poverty: A Challenge for Canada</a> Accessed April 14, 2022</li> <li>3. Sarlo C. (2013). <a href="#">Poverty: Where do we draw the line?</a> Access April 13, 2022</li> <li>4. Homeless Hub. (2021). <a href="#">Basic Needs</a>. Accessed April 13, 2022</li> </ol>                                                                                                                                                                                                                                                                                                                                                                                                                                                                                                                                                                                                                                               |
| <p><b>11: Food Security</b></p>     | <p><b>Please respond to the following statements:</b></p> <p><b>a) “Within the past 12 months, we worried whether our food would run out before we could buy or get more”</b></p> <ul style="list-style-type: none"> <li>• Often True</li> <li>• Sometimes true</li> <li>• Never true</li> <li>• Do not know</li> <li>• Prefer not Answer</li> </ul> <p><b>b) “Within the past 12 months, the food we bought just didn’t last and we could not buy or get more.”</b></p> <ul style="list-style-type: none"> <li>• Often True</li> <li>• Sometimes true</li> <li>• Never true</li> <li>• Do not know</li> <li>• Prefer not Answer</li> </ul> | <p>Not Applicable</p> | <p><b>Why are we asking this question?</b></p> <p>Your provider may use this to refer you to resources and supports that may help you obtain food and maintain a healthy diet.<sup>1,2</sup></p> <p>Your provider may also use this to give you advice on regular eating and nutrition.<sup>1</sup></p> <p>Not having enough food can mean choosing less expensive, more filling, and less healthy food. This can negatively affect your health.<sup>2</sup></p> <p>This question was adapted from the Hunger Vita Sign™ screening tool.<sup>3</sup></p> <ol style="list-style-type: none"> <li>1. National Association of Community Health Centre, Inc, Association of Asian Pacific Community Health Organization and the Oregon primary Care Association. (2019). <a href="#">PRAPARE Protocol for Responding to and Assessing Patients' Assets, Risks and Experiences. Implementation and Action Toolkit</a>. Accessed April 14, 2022</li> <li>2. Botelho, FC., Junior, IF., Guerra, LD., Rodrigues, SF., Tonaci LV. (2020). <a href="#">Scientific literature on food and nutrition security primary health care: A scoping review</a>. Global Public Health, 15(12), pp. 1902-1916.</li> <li>3. Hager, E.R., Quigg, A.M., Black, M.M., ... &amp; Cook, J.T., de Cuba, S.A.E., Casey, P.H., Chilton, M. and Cutts, D.B., 2010. <a href="#">Development and validity of a 2-item screen to identify families at risk for food insecurity</a>. <i>Pediatrics</i>, 126(1), pp.e26-e32.</li> </ol> |
| <p><b>12: Medication Access</b></p> | <p><b>In the past 12 months, were you unable to get medicine or medical supplies, or did you do anything to make them last longer because of the cost?</b></p> <ul style="list-style-type: none"> <li>• Yes</li> <li>• No</li> <li>• Not applicable, I did not have to get any medicine or medical supplies in the past 12 months</li> </ul>                                                                                                                                                                                                                                                                                                | <p>Not Applicable</p> | <p><b>Why are we asking this question?</b></p> <p>Your provider may use this to refer you to resources that can help you access medicine or medical supplies.</p> <p>This may also help your provider consider lower cost or free medicine options.</p> <p>Being able to access and use needed medicine and medical supplies can affect your health.<sup>1</sup></p>                                                                                                                                                                                                                                                                                                                                                                                                                                                                                                                                                                                                                                                                                                                                                                                                                                                                                                                                                                                                                                                                                                                                |

|                           |                                                                                                                                                                                                                                                                                                                                                                                                                                                                                                                                                                                                                                                         |                       |                                                                                                                                                                                                                                                                                                                                                                                                                                                                                                                                                                                                                                                                                                                                                                                                                                                                                                                                                                                                                                                                                                                                                                                                                                                                                                                                                                                                                                                                                                                                                                                                              |
|---------------------------|---------------------------------------------------------------------------------------------------------------------------------------------------------------------------------------------------------------------------------------------------------------------------------------------------------------------------------------------------------------------------------------------------------------------------------------------------------------------------------------------------------------------------------------------------------------------------------------------------------------------------------------------------------|-----------------------|--------------------------------------------------------------------------------------------------------------------------------------------------------------------------------------------------------------------------------------------------------------------------------------------------------------------------------------------------------------------------------------------------------------------------------------------------------------------------------------------------------------------------------------------------------------------------------------------------------------------------------------------------------------------------------------------------------------------------------------------------------------------------------------------------------------------------------------------------------------------------------------------------------------------------------------------------------------------------------------------------------------------------------------------------------------------------------------------------------------------------------------------------------------------------------------------------------------------------------------------------------------------------------------------------------------------------------------------------------------------------------------------------------------------------------------------------------------------------------------------------------------------------------------------------------------------------------------------------------------|
|                           | <ul style="list-style-type: none"> <li>• Do not know</li> <li>• Prefer not to answer</li> </ul>                                                                                                                                                                                                                                                                                                                                                                                                                                                                                                                                                         |                       | <p><b>Understanding the question:</b></p> <p><b>‘Medicine’</b> includes both prescription and over-the-counter medicines.</p> <p><b>‘Medical supplies’</b> include any equipment you may need to manage your health or disability. For example, needles, glucose monitors, walking aid</p> <ol style="list-style-type: none"> <li>1. Sobeski, L. M., Schumacher, C. A., Alvarez, N. A., ... &amp; Van Dril, E. (2021). <a href="#">Medication access: Policy and practice opportunities for pharmacists</a>. <i>Journal of the American College of Clinical Pharmacy</i>, 4(1), 113-125.</li> </ol>                                                                                                                                                                                                                                                                                                                                                                                                                                                                                                                                                                                                                                                                                                                                                                                                                                                                                                                                                                                                          |
| <p><b>13: Housing</b></p> | <p><b>a) What is your current housing situation?</b></p> <ul style="list-style-type: none"> <li>• A place you or your family owns</li> <li>• A place you or your family rents</li> <li>• Social housing, Subsidized housing or Rent-geared-to-income</li> <li>• Supportive housing or Group Home</li> <li>• Long-term care facility</li> <li>• Correctional facility</li> <li>• Staying in someone else’s place because you have no alternative</li> <li>• Experiencing homelessness (e.g., shelter, living in a public place or vehicle)</li> <li>• Other (Specify) _____</li> <li>—</li> <li>• Do not know</li> <li>• Prefer not to answer</li> </ul> | <p>Not Applicable</p> | <p><b>Why are we asking this question?</b></p> <p>Your provider may use this to refer you to resources and supports that may help you with housing needs.</p> <p>It is known that unstable housing can negatively affect people’s health.<sup>1,2</sup></p> <p><b>Understanding the question:</b></p> <p><b>Social housing</b> is housing that is subsidized or partly paid for by a level of government.<sup>3</sup></p> <p><b>Subsidized housing</b> means receiving help paying for housing from the government or a private organization.<sup>4</sup></p> <p><b>Rent-geared-to-income</b> is a type of rent assistance. It lets a person pay a percentage of their income for rent.<sup>5</sup></p> <p><b>Supportive housing</b> refers to housing with on-site staff who provide residents with ongoing support with their needs.</p> <ol style="list-style-type: none"> <li>1. Krieger, J. and Higgins, D.L. (2002). <a href="#">Housing and Health: Time Again for Public Health Action</a>. <i>American Journal of Public Health</i>, 92(5), pp.758–768.</li> <li>2. Office of Disease Prevention and Health Promotion (2014). <a href="#">Housing Instability   Healthy People 2020</a> Healthypeople.gov. Accessed April 7, 2022</li> <li>3. www.homelesshub.ca. <a href="#">Affordable Housing   The Homeless Hub</a> Accessed April 7, 2022</li> <li>4. Settlement.org. (2018). <a href="#">What is subsidized housing?</a> Accessed April 7, 2022</li> <li>5. www.durham.ca. (2021). <a href="#">Rent-Geared-to-Income Housing (RGI) - Region of Durham</a> . Accessed April 7, 2022</li> </ol> |
|                           | <p><b>b) Who do you live with? Select all that apply:</b></p> <ul style="list-style-type: none"> <li>• Parent(s) or Guardian(s)</li> </ul>                                                                                                                                                                                                                                                                                                                                                                                                                                                                                                              | <p>Not Applicable</p> | <p><b>Why are we asking this question?</b></p> <p>This information may help your provider further</p>                                                                                                                                                                                                                                                                                                                                                                                                                                                                                                                                                                                                                                                                                                                                                                                                                                                                                                                                                                                                                                                                                                                                                                                                                                                                                                                                                                                                                                                                                                        |

|                                                                                                                                                                                                                                                                                                                                                                                                                                                                                                                                           |                       |                                                                                                                                                                                                                                                                                                                                                                                                                                                                                                                                                                                                                                                                                                                                                                                                                               |
|-------------------------------------------------------------------------------------------------------------------------------------------------------------------------------------------------------------------------------------------------------------------------------------------------------------------------------------------------------------------------------------------------------------------------------------------------------------------------------------------------------------------------------------------|-----------------------|-------------------------------------------------------------------------------------------------------------------------------------------------------------------------------------------------------------------------------------------------------------------------------------------------------------------------------------------------------------------------------------------------------------------------------------------------------------------------------------------------------------------------------------------------------------------------------------------------------------------------------------------------------------------------------------------------------------------------------------------------------------------------------------------------------------------------------|
| <ul style="list-style-type: none"> <li>• Spouse or Partner</li> <li>• Child(ren)</li> <li>• Grandparent(s)</li> <li>• Sibling(s)</li> <li>• Other family</li> <li>• Friends or Roommates</li> <li>• Paid caregiver or attendant</li> <li>• Alone</li> <li>• Other (Specify)</li> </ul> <hr/> <ul style="list-style-type: none"> <li>• Do not know</li> <li>• Prefer not to answer</li> </ul>                                                                                                                                              |                       | <p>understand your living situation and the social supports that may be available to you.</p> <p>This may also help provide information on aspects of your overall health.</p> <p>It is known that living with others can impact your health.<sup>1,2</sup></p> <ol style="list-style-type: none"> <li>1. Krieger, J. and Higgins, D.L. (2002). <a href="#">Housing and Health: Telling the Truth and Putting it Right. American Journal of Public Health</a>, 92(5), pp.758–768.</li> <li>2. Office of Disease Prevention and Health Promotion (2014). <a href="#">Housing Instability   Healthy People 2020</a> Healthypeople.gov. Accessed April 7, 2022</li> </ol>                                                                                                                                                        |
| <p><b>c) In the past 12 months, was there a time when you were not able to pay the mortgage or rent on time?</b></p> <ul style="list-style-type: none"> <li>• Yes</li> <li>• No</li> <li>• Not applicable, I do not have to pay mortgage or rent</li> <li>• Do not know</li> <li>• Prefer not to answer</li> </ul>                                                                                                                                                                                                                        | <p>Not Applicable</p> | <p><b>Why are we asking this question?</b></p> <p>Your provider may use this to refer you to housing or financial resources and supports that may be helpful to you.</p> <p>Not being able to pay your mortgage or rent on time may negatively affect your health (for example, it may cause stress).<sup>1,2</sup></p> <ol style="list-style-type: none"> <li>1. Krieger, J. and Higgins, D.L. (2002). <a href="#">Housing and Health: Telling the Truth and Putting it Right. American Journal of Public Health</a>, 92(5), pp.758–768.</li> <li>2. Office of Disease Prevention and Health Promotion (2014). <a href="#">Housing Instability   Healthy People 2020</a> Healthypeople.gov. Accessed April 7, 2022</li> </ol>                                                                                                |
| <p><b>14: Transportation</b></p> <p><b>In the past 12 months, has lack of transportation kept you from medical appointments, meetings, work, or from getting things needed for daily living? Select all that apply:</b></p> <ul style="list-style-type: none"> <li>• Yes, it has kept me from medical appointments or getting medicines</li> <li>• Yes, it has kept me from non-medical meetings, appointments, work, or getting things that I need</li> <li>• No</li> <li>• Not applicable, I did not need transportation for</li> </ul> | <p>Not Applicable</p> | <p><b>Why are we asking this question?</b></p> <p>Your provider may use this to refer you to transportation resources and supports.</p> <p>Lack of transportation can impact your health.<sup>1-4</sup> may make it hard to get to a healthcare appointment on time. It can also make it hard to get to and from work, get healthy food, use medicine on time, or get something you need.</p> <p><b>Understanding the question:</b></p> <p>“<b>Medical Appointments</b>” are appointments to meet your health needs. This may include an appointment with your doctor(s), specialist, or social worker. This also includes getting medicine from your doctor or pharmacist.<sup>1</sup></p> <p>You might lack transportation because of:<sup>4</sup></p> <ul style="list-style-type: none"> <li>• cost and access,</li> </ul> |

|                                             |                                                                                                                                                                                                                                                                               |                       |                                                                                                                                                                                                                                                                                                                                                                                                                                                                                                                                                                                                                                                                                                                                                                                                                                                                                                                                                                                                                                                                                                                                                                                                                                                                                                                                                                                                                                                                                                                                        |
|---------------------------------------------|-------------------------------------------------------------------------------------------------------------------------------------------------------------------------------------------------------------------------------------------------------------------------------|-----------------------|----------------------------------------------------------------------------------------------------------------------------------------------------------------------------------------------------------------------------------------------------------------------------------------------------------------------------------------------------------------------------------------------------------------------------------------------------------------------------------------------------------------------------------------------------------------------------------------------------------------------------------------------------------------------------------------------------------------------------------------------------------------------------------------------------------------------------------------------------------------------------------------------------------------------------------------------------------------------------------------------------------------------------------------------------------------------------------------------------------------------------------------------------------------------------------------------------------------------------------------------------------------------------------------------------------------------------------------------------------------------------------------------------------------------------------------------------------------------------------------------------------------------------------------|
|                                             | <p>these activities in the past 12 months</p> <ul style="list-style-type: none"> <li>• Do not know</li> <li>• Prefer not to answer</li> </ul>                                                                                                                                 |                       | <ul style="list-style-type: none"> <li>• distance,</li> <li>• gas or parking costs,</li> <li>• public transportation safety,</li> <li>• and/or other reasons.</li> </ul> <p><b>“Things needed for daily living”</b> are things such as groceries or personal products that you need to be healthy.</p> <p>This question was adapted from the PREPARE tool.<sup>1</sup></p> <ol style="list-style-type: none"> <li>1. National Association of Community Health Centre, Inc, Association of Asian Pacific Community Health Organization and the Oregon primary Care Association. (2019). <a href="#">PRAPARE Protocol for Responding to and Assessing Patients’ Assets, Risks and Experiences. Implementation and Action Toolkit</a>. Accessed April 14, 2022</li> <li>2. Billioux, A., Verlander, K., Anthony, S., Alley, D. <a href="#">Standardiz screening for health-related social needs in clinical settings: th accountable health communities screening tool</a>. Discussion Paper, National Academy of Medicine, Washington, DC. Accessed April 14, 2022</li> <li>3. Razon, N., Gottlieb, L. (2022). <a href="#">Content Analysis of Transportation Screening Questions in Social Risk Assessment Tools: Are we capturing transportation insecurity</a>. Journal of t American Board of Family Medicine, 35(2), pp.400-405.</li> <li>4. Syed, ST., Gerber, BS., Shapr, LK. (2013). <a href="#">Traveling toward disease” transportation barriers to health care access</a>. J community Health, 38(5), pp. 976-993.</li> </ol> |
| <p><b>15: Phone and Internet Access</b></p> | <p><b>Do you currently have consistent access to a phone or the internet?</b></p> <ul style="list-style-type: none"> <li>• Yes, phone only</li> <li>• Yes, internet only</li> <li>• Yes, both</li> <li>• No</li> <li>• Do not know</li> <li>• Prefer not to answer</li> </ul> | <p>Not Applicable</p> | <p><b>Why are we asking this question?</b></p> <p>Your provider may use this to refer you to resources that can improve your access to phone and internet services.</p> <p>These resources may help improve your access to health care appointments and health information.</p> <p>This information may also inform how you receive health care services. For example, by phone, video, or in-person.</p> <p>Access to a phone and internet is now a basic human right. This is due to its impact on access to health care and other needed services.<sup>1,2</sup></p> <p><b>Understanding the question:</b></p> <p><b>“Consistent access”</b> means having regular, reliable, and adequate access to a phone or internet to obtain needed services. This includes access to a phone or internet for a healthcare appointment. This also includes access to health information that is on the internet that your provider refers you to.<sup>3</sup></p>                                                                                                                                                                                                                                                                                                                                                                                                                                                                                                                                                                              |



|                                   |                                                                                                                                                                                                                                                                                                                                                                                                   |                       |                                                                                                                                                                                                                                                                                                                                                                                                                                                                                                                                                                                                                                                                                                                                                                                                                                                                                                                                                                                                                                                                                                                                                                                                                                                                                                                                                                                                                                                                                                     |
|-----------------------------------|---------------------------------------------------------------------------------------------------------------------------------------------------------------------------------------------------------------------------------------------------------------------------------------------------------------------------------------------------------------------------------------------------|-----------------------|-----------------------------------------------------------------------------------------------------------------------------------------------------------------------------------------------------------------------------------------------------------------------------------------------------------------------------------------------------------------------------------------------------------------------------------------------------------------------------------------------------------------------------------------------------------------------------------------------------------------------------------------------------------------------------------------------------------------------------------------------------------------------------------------------------------------------------------------------------------------------------------------------------------------------------------------------------------------------------------------------------------------------------------------------------------------------------------------------------------------------------------------------------------------------------------------------------------------------------------------------------------------------------------------------------------------------------------------------------------------------------------------------------------------------------------------------------------------------------------------------------|
|                                   |                                                                                                                                                                                                                                                                                                                                                                                                   |                       | <ol style="list-style-type: none"> <li>1. Benda, NC., Veinot, TC., Sieck, C., Ancker, JS. (2020). <a href="#">Broadband internet access is a social determinant of Health!</a> <i>AJPH Public Health</i>, 110(8), pp. 1123-1125. doi:</li> <li>2. Rubin, R., 2021. <a href="#">Internet access as a social determinant of health</a>. <i>JAMA</i>, 326(4), pp.298-298.</li> <li>3. Graves, JM., Abshire, DA., Amiri, S., Mackelprang, JL. (2021). <a href="#">Disparities in technology and broadband internet access across rurality: implications for health and education</a>. <i>Fam Communi Health</i>, 44(4), pp. 257-265.</li> </ol>                                                                                                                                                                                                                                                                                                                                                                                                                                                                                                                                                                                                                                                                                                                                                                                                                                                         |
| <p><b>16: Utilities</b></p>       | <p><b>In the past 12 months, did you miss making a payment on any utility bills (e.g., electric, gas/oil, water) because of cost?</b></p> <ul style="list-style-type: none"> <li>• Yes</li> <li>• No</li> <li>• Not applicable, I did not have to pay utility bills in the past 12 months or utilities already included in rent</li> <li>• Do not know</li> <li>• Prefer not to answer</li> </ul> | <p>Not Applicable</p> | <p><b>Why are we asking this question?</b></p> <p>Your provider may use this to refer you to supports that may be helpful to you.</p> <p>Difficulty paying for utilities can negatively affect your health.<sup>1</sup> For example, you need heat when it is cold outside.<sup>2</sup></p> <p>Difficulty paying utility bills can also be a sign of financial need, which can affect your health (for example, it may cause stress).</p> <p><b>Understanding the question:</b></p> <p>This question is asking about basic utilities. Basic utilities may include:</p> <ul style="list-style-type: none"> <li>• heating or cooling</li> <li>• electricity or hydro</li> <li>• water or sewer</li> <li>• phone, and internet.</li> </ul> <p>The specific utilities you pay for may depend on where you live. For example, you may heat your home using natural gas, furnace oil or wood depending on where you live.</p> <ol style="list-style-type: none"> <li>1. International Policy Centre for Inclusive Growth (2009) <a href="#">Equitable access to basic utilities: Public versus private provision and beyond</a>. Accessed: April 20, 2022.</li> <li>2. Grey, C. N., Jiang, S., Nascimento, C., Rodgers, S. E., Johnson R., Lyons, R. A., &amp; Poortinga, W. (2017). <a href="#">The short-term health and psychosocial impacts of domestic energy efficiency investments in low-income areas: a controlled before and after study</a>. <i>BMC Public Health</i>, 17(1), 1-10.</li> </ol> |
| <p><b>17: Social Supports</b></p> | <p><b>a) Do you feel you have people who you can open up to or confide in?</b></p> <ul style="list-style-type: none"> <li>• Yes, I always or sometimes have someone</li> <li>• No, I don't have anyone</li> <li>• Do not know</li> <li>• Prefer not to answer</li> </ul>                                                                                                                          | <p>Not Applicable</p> | <p><b>Why are we asking this question?</b></p> <p>Your provider may use this to refer you to social resources and social supports that may be helpful to you.</p> <p><b>Understanding the question</b></p> <p>Having “<b>people you feel you can open up to or</b></p>                                                                                                                                                                                                                                                                                                                                                                                                                                                                                                                                                                                                                                                                                                                                                                                                                                                                                                                                                                                                                                                                                                                                                                                                                              |

|                              |                                                                                                                                                                                                                                                                     |                                                                                                                                                                                                                                                                                                                            |                                                                                                                                                                                                                                                                                                                                                                                                                                                                                                                                                                                                                                                                                                                                                                                                                                                        |
|------------------------------|---------------------------------------------------------------------------------------------------------------------------------------------------------------------------------------------------------------------------------------------------------------------|----------------------------------------------------------------------------------------------------------------------------------------------------------------------------------------------------------------------------------------------------------------------------------------------------------------------------|--------------------------------------------------------------------------------------------------------------------------------------------------------------------------------------------------------------------------------------------------------------------------------------------------------------------------------------------------------------------------------------------------------------------------------------------------------------------------------------------------------------------------------------------------------------------------------------------------------------------------------------------------------------------------------------------------------------------------------------------------------------------------------------------------------------------------------------------------------|
|                              | <p><b>b) Do you have people to rely on if you needed help?</b></p> <ul style="list-style-type: none"> <li>• Yes, I always or have someone</li> <li>• No, I don't have anyone</li> <li>• Do not know</li> <li>• Prefer not to answer</li> </ul>                      |                                                                                                                                                                                                                                                                                                                            | <p><b>confide in”</b> means being able to talk to people that you care about, trust and feel close to.<sup>1</sup></p> <p>Having social relationships and feeling connected can impact health.<sup>1</sup></p> <p><b>b. Why are we asking this question?</b></p> <p>Your provider may refer you to social resources and social supports that may be helpful to you. Having <b>“people you can rely on”</b> can help you feel more socially connected and secure, and this may impact your health.</p> <p>1. National Association of Community Health Centre, Inc, Association of Asian Pacific Community Health Organization and the Oregon primary Care Association. (2019). <a href="#">PRAPARE Protocol for Responding to and Assessing Patients’ Assets, Risks and Experiences. Implementation and Action Toolkit.</a> Accessed April 14, 2022</p> |
| <p><b>18: Employment</b></p> | <p><b>a) Are you currently employed (this includes self-employed, full-time, part-time or other)?</b></p> <ul style="list-style-type: none"> <li>• Yes</li> <li>• No</li> <li>• Do not know</li> <li>• Prefer not to answer</li> </ul>                              | <p><b>a) Are you currently employed (this includes self-employed, full-time, part-time or other)?</b></p> <ul style="list-style-type: none"> <li>• Yes → Go to question 18c</li> <li>• No → Go to question 18b</li> <li>• Do not know → Go to question 18b</li> <li>• Prefer not to answer → Go to question 18b</li> </ul> | <p><b>Why are we asking this question?</b></p> <p>Your provider may use this information to better understand employment circumstances that could be affecting your health. Your provider may also refer you to employment resources that could be helpful. It is known that those who work tend to have better health than those who are unemployed.<sup>1</sup></p> <p>1. Waddell, G., &amp; Burton, A. K. (2006). <a href="#">Is work good for your health and well-being?</a> Accessed April 4, 2022.</p>                                                                                                                                                                                                                                                                                                                                          |
|                              | <p><b>b) Are you currently looking for work?</b></p> <ul style="list-style-type: none"> <li>• Yes</li> <li>• No</li> <li>• Not applicable, I am currently employed [remove if skip logic is used]</li> <li>• Do not know</li> <li>• Prefer not to answer</li> </ul> | <p>b) [If no is selected in 18a] <b>Are you currently looking for work?</b></p> <ul style="list-style-type: none"> <li>• Yes → Go to question 19</li> <li>• No → Go to question 19</li> <li>• Do not know → Go to question 19</li> <li>• Prefer not to answer → Go to question 19</li> </ul>                               | <p><b>Why are we asking this question?</b></p> <p>Your provider may use this information to refer you to employment resources that may be helpful.</p>                                                                                                                                                                                                                                                                                                                                                                                                                                                                                                                                                                                                                                                                                                 |
|                              | <p><b>c) Is your main job temporary or part-time (e.g., casual, contract,</b></p>                                                                                                                                                                                   | <p>c) [If yes is selected in 18a] <b>Is your main job temporary or part-</b></p>                                                                                                                                                                                                                                           | <p><b>Why are we asking this question?</b></p> <p>Your provider may use this information to better</p>                                                                                                                                                                                                                                                                                                                                                                                                                                                                                                                                                                                                                                                                                                                                                 |

|                                                                                                                                                                                                                                                                                                                                                                                  |                                                                                                                                                                                                                                                                                                                                                                                                         |                                                                                                                                                                                                                                                                                                                                                                                                                                                                                                                                                                                                                                                                                                                                                                                                                                                                                                                                                                                                                                                                                                                                |
|----------------------------------------------------------------------------------------------------------------------------------------------------------------------------------------------------------------------------------------------------------------------------------------------------------------------------------------------------------------------------------|---------------------------------------------------------------------------------------------------------------------------------------------------------------------------------------------------------------------------------------------------------------------------------------------------------------------------------------------------------------------------------------------------------|--------------------------------------------------------------------------------------------------------------------------------------------------------------------------------------------------------------------------------------------------------------------------------------------------------------------------------------------------------------------------------------------------------------------------------------------------------------------------------------------------------------------------------------------------------------------------------------------------------------------------------------------------------------------------------------------------------------------------------------------------------------------------------------------------------------------------------------------------------------------------------------------------------------------------------------------------------------------------------------------------------------------------------------------------------------------------------------------------------------------------------|
| <p><b>freelance, short-term, seasonal)?</b></p> <ul style="list-style-type: none"> <li>• Yes</li> <li>• No</li> <li>• Not applicable, I am not currently employed [remove if skip logic is used]</li> <li>• Do not know</li> <li>• Prefer not to answer</li> </ul>                                                                                                               | <p><b>time (e.g., casual, contract, freelance, short-term, seasonal)?</b></p> <ul style="list-style-type: none"> <li>• Yes → Go to question 18d</li> <li>• No → Go to question 18d</li> <li>• Do not know → Go to question 18d</li> <li>• Prefer not to answer → Go to question 18d</li> </ul>                                                                                                          | <p>understand employment circumstances that may be affecting your health.</p> <p>Your provider may also refer you to employment resources that could be helpful.</p> <p>It is known that unstable or unpredictable work negatively affects peoples’ health.<sup>1,2</sup></p> <p><b>Understanding the question:</b></p> <p><b>“Main job”:</b> If you have more than one job, your main job is your primary source of income.</p> <ol style="list-style-type: none"> <li>1. Benach, J., Vives, A., Amable, M., Vanroelen, C., Tarafa, G. and Muntaner, C., 2014. <a href="#">Precarious employment: understanding an emerging social determinant of health</a>. <i>Annual review of public health</i>, 35, pp.229-253.</li> <li>2. Benach, J., Vives, A., Tarafa, G., Delclos, C. and Muntaner, C. 2016. <a href="#">What should we know about precarious employment and health in 2025? Framing the agenda for the next decade of research</a>. <i>International journal of epidemiology</i>, 45(1), pp.232-238.</li> </ol>                                                                                                    |
| <p><b>d) Do you feel that your current employment could be negatively affected if you raised concerns about your work (e.g., health, safety, rights)?</b></p> <ul style="list-style-type: none"> <li>• Yes</li> <li>• No</li> <li>• Not applicable, I am not currently employed [remove if skip logic is used]</li> <li>• Do not know</li> <li>• Prefer not to answer</li> </ul> | <p>[If yes is selected in 18a] <b>Do you feel that your current employment could be negatively affected if you raised concerns about your work (e.g., health, safety, rights)?</b></p> <ul style="list-style-type: none"> <li>• Yes → Go to question 18e</li> <li>• No → Go to question 18e</li> <li>• Do not know → Go to question 18e</li> <li>• Prefer not to answer → Go to question 18e</li> </ul> | <p><b>Why are we asking this question?</b></p> <p>Your provider may use this information to better understand employment circumstances that may be affecting your health.</p> <p>Your provider may also refer you to employment resources that could be helpful.</p> <p>A person’s inability or unwillingness to raise concerns about health, safety and rights at work can negatively affect their health.<sup>1</sup></p> <p><b>Understanding the question:</b></p> <p><b>Health and safety concerns</b> at work may include concerns about unsafe work (for example, lifting items that are too heavy, working with violent clients), unsafe work environments (for example slippery floors, broken machinery), or harassment due to race, gender, or sexual orientation.<sup>1</sup></p> <p><b>Concerns about employment rights</b> may include questions about your right to breaks, sick leave or vacation time.<sup>1</sup></p> <p>Your <b>health and safety rights</b><sup>1</sup> include your right to:</p> <ul style="list-style-type: none"> <li>• know about unsafe work</li> <li>• refuse unsafe work</li> </ul> |

|                           |                                                                                                                                                                                                                                                                                                    |                                                                                                                                                                                                                                                                                                                         |                                                                                                                                                                                                                                                                                                                                                                                                                                                                                                                                                                                                                                                                                                                                                                                                                                                                                                                                                                                                                        |
|---------------------------|----------------------------------------------------------------------------------------------------------------------------------------------------------------------------------------------------------------------------------------------------------------------------------------------------|-------------------------------------------------------------------------------------------------------------------------------------------------------------------------------------------------------------------------------------------------------------------------------------------------------------------------|------------------------------------------------------------------------------------------------------------------------------------------------------------------------------------------------------------------------------------------------------------------------------------------------------------------------------------------------------------------------------------------------------------------------------------------------------------------------------------------------------------------------------------------------------------------------------------------------------------------------------------------------------------------------------------------------------------------------------------------------------------------------------------------------------------------------------------------------------------------------------------------------------------------------------------------------------------------------------------------------------------------------|
|                           |                                                                                                                                                                                                                                                                                                    |                                                                                                                                                                                                                                                                                                                         | <ul style="list-style-type: none"> <li>participate in workplace health and safety decisions</li> </ul> <ol style="list-style-type: none"> <li>Lewchuk, W., 2013. <a href="#">The limits of voice: Are workers afraid to express their health and safety rights.</a> Osgoode Hall LJ, 50(4), 789-812. Accessed April 20, 2022</li> </ol>                                                                                                                                                                                                                                                                                                                                                                                                                                                                                                                                                                                                                                                                                |
|                           | <p>e) <b>In the past 12 months, did your income change a lot from month to month?</b></p> <ul style="list-style-type: none"> <li>Yes</li> <li>No</li> <li>Not applicable, I am not currently employed [remove if skip logic is used]</li> <li>Do not know</li> <li>Prefer not to answer</li> </ul> | <p>[If yes is selected in 18a] <b>In the past 12 months, did your income change a lot from month to month?</b></p> <ul style="list-style-type: none"> <li>Yes → Go to question 19</li> <li>No → Go to question 19</li> <li>Do not know → Go to question 19</li> <li>Prefer not to answer → Go to question 19</li> </ul> | <p><b>Why are we asking this question?</b></p> <p>Your provider may use this information to understand employment conditions that could be affecting your health.</p> <p>Your provider may also refer you to employment or income resources that could be helpful.</p> <p>Changing income is a key feature of unstable or unpredictable work. This is known to have negative effects on health<sup>1</sup>.</p> <ol style="list-style-type: none"> <li>Lewchuk, W., 2012. <a href="#">The limits of voice: Are workers afraid to express their health and safety rights.</a> Osgoode Hall LJ, 50, p. 789-812. Accessed April 20, 2022</li> </ol>                                                                                                                                                                                                                                                                                                                                                                       |
| <i>Optional Questions</i> |                                                                                                                                                                                                                                                                                                    |                                                                                                                                                                                                                                                                                                                         |                                                                                                                                                                                                                                                                                                                                                                                                                                                                                                                                                                                                                                                                                                                                                                                                                                                                                                                                                                                                                        |
| <b>1: Ethnicity</b>       | <p><b>What is your ethnic or cultural background?</b> e.g., Chinese, Filipino, Guyanese, Scottish, Somali, Korean</p> <hr/>                                                                                                                                                                        | Not Applicable                                                                                                                                                                                                                                                                                                          | <p><b>Why are we asking this question?</b></p> <p>This question gives people a space to share their ethnic or cultural identity. This information lets us know who we serve at the clinic and may help us understand and address the unique needs of our patients.</p> <p><b>Understanding the question:</b></p> <p>This question on ethnicity should not be confused with Race. <b>Ethnicity</b> refers to groups of people who share a common culture or ancestry. They may also share a common language, religion, geographic origin, nationality, cultural traditions migration history and so on.<sup>1,2</sup></p> <p><b>Race</b> is a term used to classify people into groups usually based on observable physical characteristics (e.g., skin colour) but can also include characteristics such as accent, dress and so on.<sup>1,2,3</sup></p> <p>Although these differences or groupings are created by the society we live in, racial categories can have significant consequences for people's lives,</p> |

|                           |                                                                                                                                                                                                                                                                                                                                                                                                                                                                                                                                                                                                                                                                                                                                                                                                                                                           |                       |                                                                                                                                                                                                                                                                                                                                                                                                                                                                                                                                                                                                                                                                                                                                                                                                                                                                                                                                                                                                                                                                                                                                                                                                                                                                                                                                                               |
|---------------------------|-----------------------------------------------------------------------------------------------------------------------------------------------------------------------------------------------------------------------------------------------------------------------------------------------------------------------------------------------------------------------------------------------------------------------------------------------------------------------------------------------------------------------------------------------------------------------------------------------------------------------------------------------------------------------------------------------------------------------------------------------------------------------------------------------------------------------------------------------------------|-----------------------|---------------------------------------------------------------------------------------------------------------------------------------------------------------------------------------------------------------------------------------------------------------------------------------------------------------------------------------------------------------------------------------------------------------------------------------------------------------------------------------------------------------------------------------------------------------------------------------------------------------------------------------------------------------------------------------------------------------------------------------------------------------------------------------------------------------------------------------------------------------------------------------------------------------------------------------------------------------------------------------------------------------------------------------------------------------------------------------------------------------------------------------------------------------------------------------------------------------------------------------------------------------------------------------------------------------------------------------------------------------|
|                           |                                                                                                                                                                                                                                                                                                                                                                                                                                                                                                                                                                                                                                                                                                                                                                                                                                                           |                       | <p>including unfair and unjust treatment by individuals and institutions. This is what we call racism.</p> <p>We welcome you to share the ethnic group or culture you identify with.</p> <ol style="list-style-type: none"> <li>1. Canadian Institute for Health Information (2022) <a href="#">Guidance on the Use of Standards for Race-Based and Indigenous Identity Data Collection and Health Reporting in Canada</a>. Ottawa, ON: CIHI. Accessed April 5, 2022</li> <li>2. Torontohealthequity.ca. <a href="#">Measuring Health Equity: Demographic Data Collection in Health Care</a>. Accessed April 5, 2022</li> <li>3. Government of Ontario Anti-Racism Directorate. <a href="#">Data Standards for the Identification and Monitoring of Systemic Racism</a>. Accessed April 5, 2022</li> </ol>                                                                                                                                                                                                                                                                                                                                                                                                                                                                                                                                                    |
| <p><b>2: Religion</b></p> | <p><b>What is your religious or spiritual affiliation? Select all that apply:</b></p> <ul style="list-style-type: none"> <li>• Agnosticism</li> <li>• Animism or Shamanism</li> <li>• Atheism</li> <li>• Baha'i Faith</li> <li>• Buddhism</li> <li>• Christian Orthodox</li> <li>• Christian, <i>not included elsewhere on this list</i></li> <li>• Confucianism</li> <li>• Hinduism</li> <li>• Islam</li> <li>• Jainism</li> <li>• Judaism</li> <li>• Native Spirituality</li> <li>• Pagan</li> <li>• Protestant</li> <li>• Rastafarianism</li> <li>• Roman Catholic</li> <li>• Sikhism</li> <li>• Spiritual</li> <li>• Unitarianism</li> <li>• Zoroastrianism</li> <li>• Other (Specify)</li> </ul> <hr/> <ul style="list-style-type: none"> <li>• Not Applicable, I do not have a religious or spiritual affiliation</li> <li>• Do not know</li> </ul> | <p>Not Applicable</p> | <p><b>Why are we asking this question?</b></p> <p>Your provider may use this to better understand how your religious or spiritual beliefs and practices influence your health or health behaviors. This may include your diet, holidays you observe, or the health care treatment options you feel comfortable with.</p> <p>Your provider may use this to inform the care you receive.</p> <p>It is known that religious affiliation or involvement can positively affect health<sup>1</sup>.</p> <p><b>Understanding the question:</b></p> <p>“<b>Religious or spiritual affiliation</b>” is about your connection with a particular set of beliefs, attitudes, or practices. This may or may not be related to a specific religion (for example, Catholicism, Islam) or belief in a higher being.<sup>1</sup> This also relates to a person's sense of spirituality.</p> <p>Select the religion(s) you feel connected to. This includes a religion you are actively practicing, your family raised you in, or you feel close to.</p> <p>You can select more than one option. If you do not find your religion listed, you can write it in.</p> <ol style="list-style-type: none"> <li>1. Chatters, L. (2000) <a href="#">‘Religion and Health: Public health research and practice.’</a> Annual Review of Public Health, 21, pp. 335-30<br/>Doi:</li> </ol> |

- Prefer not to answer

WITHDRAWN  
see manuscript DOI for details
